# Supplementary material for: Global, Regional, and National Incidence and Mortality of Neonatal Preterm Birth, 1990-2019
Source: PubMed Central journal article supplement (PMC9157382; doi:10.1001/jamapediatrics.2022.1622), 2022-05-31
Supplement: jamapediatr-e221622-s001.pdf [file jamapediatr-e221622-s001.pdf]

## Supplemental Online Content

Cao G, Liu J, Liu M. Global, regional, and national incidence and mortality of neonatal preterm birth, 1990-2019. *JAMA Pediatr*. Published online May 31, 2022. doi:10.1001/jamapediatrics.2022.1622

**eTable 1.** The SDI and UHCI of 204 countries and territories in 2019

**eTable 2.** The incident cases and ASIRs of neonatal preterm birth in 1990 and 2019 and their change trends from 1990 to 2019 at national level

**eTable 3.** The deaths and ASMRs of neonatal preterm birth in 1990 and 2019 and their change trends from 1990 to 2019 at national level

**eFigure 1.** The ASIRs and ASMRs of neonatal preterm birth by SDI regions, from 1990 to 2019

**eFigure 2.** The deaths number of neonatal preterm birth by age group, by SDI regions, from 1990 to 2019

**eFigure 3.** The age distribution of deaths of neonatal preterm birth by GBD region in 1990 and 2019

This supplemental material has been provided by the authors to give readers additional information about their work.

**eTable 1. The SDI and UHCI of 204 countries and territories in 2019**

| Nation                   | SDI   | UHCI   |
|--------------------------|-------|--------|
| Afghanistan              | 0.343 | 39.295 |
| Albania                  | 0.681 | 69.626 |
| Algeria                  | 0.652 | 64.855 |
| American Samoa           | 0.712 | 53.197 |
| Andorra                  | 0.894 | 91.748 |
| Angola                   | 0.470 | 39.158 |
| Antigua and Barbuda      | 0.743 | 59.630 |
| Argentina                | 0.708 | 61.158 |
| Armenia                  | 0.689 | 62.435 |
| Australia                | 0.839 | 89.423 |
| Austria                  | 0.849 | 86.370 |
| Azerbaijan               | 0.683 | 48.181 |
| Bahamas                  | 0.796 | 60.565 |
| Bahrain                  | 0.751 | 70.577 |
| Bangladesh               | 0.483 | 53.883 |
| Barbados                 | 0.742 | 61.207 |
| Belarus                  | 0.745 | 70.462 |
| Belgium                  | 0.851 | 87.301 |
| Belize                   | 0.603 | 54.280 |
| Benin                    | 0.352 | 44.624 |
| Bermuda                  | 0.813 | 77.549 |
| Bhutan                   | 0.455 | 51.301 |
| Bolivia                  | 0.566 | 52.399 |
| Bosnia and Herzegovina   | 0.718 | 64.184 |
| Botswana                 | 0.634 | 57.518 |
| Brazil                   | 0.640 | 64.828 |
| Brunei                   | 0.823 | 65.532 |
| Bulgaria                 | 0.764 | 62.557 |
| Burkina Faso             | 0.257 | 41.797 |
| Burundi                  | 0.284 | 49.940 |
| Cambodia                 | 0.469 | 57.079 |
| Cameroon                 | 0.490 | 42.290 |
| Canada                   | 0.873 | 90.302 |
| Cape Verde               | 0.525 | 62.188 |
| Central African Republic | 0.274 | 22.300 |
| Chad                     | 0.238 | 31.372 |
| Chile                    | 0.759 | 74.350 |
| China                    | 0.686 | 69.712 |
| Colombia                 | 0.633 | 74.397 |
| Comoros                  | 0.455 | 48.139 |
| Congo                    | 0.568 | 43.904 |

|                                  |       |        |
|----------------------------------|-------|--------|
| Cook Islands                     | 0.764 | 62.228 |
| Costa Rica                       | 0.680 | 79.015 |
| Cote d'Ivoire                    | 0.408 | 43.040 |
| Croatia                          | 0.794 | 78.935 |
| Cuba                             | 0.668 | 72.592 |
| Cyprus                           | 0.841 | 79.602 |
| Czech Republic                   | 0.828 | 81.944 |
| Democratic Republic of the Congo | 0.382 | 45.169 |
| Denmark                          | 0.890 | 84.140 |
| Djibouti                         | 0.459 | 45.287 |
| Dominica                         | 0.729 | 51.809 |
| Dominican Republic               | 0.592 | 52.500 |
| Ecuador                          | 0.640 | 64.454 |
| Egypt                            | 0.658 | 54.797 |
| El Salvador                      | 0.573 | 61.678 |
| Equatorial Guinea                | 0.685 | 49.994 |
| Eritrea                          | 0.396 | 42.275 |
| Estonia                          | 0.835 | 82.039 |
| Eswatini                         | 0.577 | 53.397 |
| Ethiopia                         | 0.343 | 46.522 |
| Federated States of Micronesia   | 0.580 | 34.474 |
| Fiji                             | 0.664 | 45.176 |
| Finland                          | 0.856 | 91.349 |
| France                           | 0.834 | 90.766 |
| Gabon                            | 0.656 | 53.050 |
| Gambia                           | 0.399 | 48.065 |
| Georgia                          | 0.702 | 55.953 |
| Germany                          | 0.898 | 86.249 |
| Ghana                            | 0.557 | 49.139 |
| Greece                           | 0.794 | 80.140 |
| Greenland                        | 0.761 | 68.725 |
| Grenada                          | 0.669 | 50.484 |
| Guam                             | 0.813 | 63.773 |
| Guatemala                        | 0.526 | 52.099 |
| Guinea                           | 0.325 | 32.335 |
| Guinea-Bissau                    | 0.355 | 35.707 |
| Guyana                           | 0.618 | 40.622 |
| Haiti                            | 0.432 | 35.812 |
| Honduras                         | 0.496 | 54.284 |
| Hungary                          | 0.791 | 72.028 |
| Iceland                          | 0.869 | 95.307 |
| India                            | 0.566 | 46.826 |
| Indonesia                        | 0.660 | 48.728 |

|                  |       |        |
|------------------|-------|--------|
| Iran             | 0.670 | 69.515 |
| Iraq             | 0.671 | 57.725 |
| Ireland          | 0.867 | 90.346 |
| Israel           | 0.803 | 81.385 |
| Italy            | 0.801 | 88.895 |
| Jamaica          | 0.684 | 56.840 |
| Japan            | 0.870 | 96.341 |
| Jordan           | 0.731 | 69.967 |
| Kazakhstan       | 0.723 | 59.237 |
| Kenya            | 0.508 | 51.647 |
| Kiribati         | 0.527 | 35.736 |
| Kuwait           | 0.851 | 81.833 |
| Kyrgyzstan       | 0.596 | 52.952 |
| Lao              | 0.490 | 43.855 |
| Latvia           | 0.820 | 69.788 |
| Lebanon          | 0.708 | 74.533 |
| Lesotho          | 0.507 | 38.737 |
| Liberia          | 0.370 | 47.600 |
| Libya            | 0.709 | 66.328 |
| Lithuania        | 0.843 | 70.352 |
| Luxembourg       | 0.895 | 91.455 |
| Macedonia        | 0.744 | 60.746 |
| Madagascar       | 0.396 | 39.691 |
| Malawi           | 0.384 | 55.521 |
| Malaysia         | 0.737 | 66.574 |
| Maldives         | 0.562 | 66.857 |
| Mali             | 0.263 | 40.661 |
| Malta            | 0.801 | 82.881 |
| Marshall Islands | 0.544 | 44.004 |
| Mauritania       | 0.496 | 53.278 |
| Mauritius        | 0.705 | 55.809 |
| Mexico           | 0.649 | 61.437 |
| Moldova          | 0.696 | 62.194 |
| Monaco           | 0.902 | 91.353 |
| Mongolia         | 0.606 | 47.907 |
| Montenegro       | 0.791 | 65.959 |
| Morocco          | 0.548 | 58.032 |
| Mozambique       | 0.307 | 44.044 |
| Myanmar          | 0.521 | 46.954 |
| Namibia          | 0.612 | 62.169 |
| Nauru            | 0.618 | 42.002 |
| Nepal            | 0.422 | 47.280 |
| Netherlands      | 0.883 | 89.588 |

|                                  |       |        |
|----------------------------------|-------|--------|
| New Zealand                      | 0.840 | 82.978 |
| Nicaragua                        | 0.517 | 57.159 |
| Niger                            | 0.162 | 35.026 |
| Nigeria                          | 0.515 | 38.339 |
| Niue                             | 0.711 | 49.010 |
| North Korea                      | 0.558 | 52.838 |
| Northern Mariana Islands         | 0.771 | 60.411 |
| Norway                           | 0.913 | 94.241 |
| Oman                             | 0.783 | 71.221 |
| Pakistan                         | 0.449 | 39.168 |
| Palau                            | 0.738 | 45.067 |
| Palestine                        | 0.588 | 61.234 |
| Panama                           | 0.686 | 71.155 |
| Papua New Guinea                 | 0.394 | 37.767 |
| Paraguay                         | 0.638 | 63.351 |
| Peru                             | 0.648 | 75.759 |
| Philippines                      | 0.623 | 54.712 |
| Poland                           | 0.802 | 72.656 |
| Portugal                         | 0.743 | 83.533 |
| Puerto Rico                      | 0.814 | 75.531 |
| Qatar                            | 0.830 | 80.403 |
| Romania                          | 0.760 | 69.585 |
| Russia                           | 0.805 | 68.974 |
| Rwanda                           | 0.429 | 59.359 |
| Saint Kitts and Nevis            | 0.746 | 52.885 |
| Saint Lucia                      | 0.670 | 59.140 |
| Saint Vincent and the Grenadines | 0.627 | 49.494 |
| Samoa                            | 0.641 | 49.796 |
| San Marino                       | 0.884 | 92.716 |
| Sao Tome and Principe            | 0.502 | 54.755 |
| Saudi Arabia                     | 0.805 | 64.196 |
| Senegal                          | 0.389 | 49.610 |
| Serbia                           | 0.767 | 63.349 |
| Seychelles                       | 0.724 | 61.517 |
| Sierra Leone                     | 0.347 | 42.120 |
| Singapore                        | 0.861 | 92.440 |
| Slovakia                         | 0.812 | 77.983 |
| Slovenia                         | 0.840 | 89.834 |
| Solomon Islands                  | 0.407 | 39.333 |
| Somalia                          | 0.081 | 23.940 |
| South Africa                     | 0.678 | 59.727 |
| South Korea                      | 0.878 | 89.162 |
| South Sudan                      | 0.363 | 41.694 |

|                              |       |        |
|------------------------------|-------|--------|
| Spain                        | 0.767 | 90.006 |
| Sri Lanka                    | 0.690 | 65.563 |
| Sudan                        | 0.515 | 51.835 |
| Suriname                     | 0.636 | 50.134 |
| Sweden                       | 0.872 | 90.361 |
| Switzerland                  | 0.929 | 93.498 |
| Syrian Arab Republic         | 0.619 | 57.565 |
| Taiwan (Province of China)   | 0.868 | 79.081 |
| Tajikistan                   | 0.539 | 47.878 |
| Thailand                     | 0.423 | 55.249 |
| Timor-Leste                  | 0.687 | 71.600 |
| Togo                         | 0.514 | 45.954 |
| Tokelau                      | 0.417 | 42.809 |
| Tonga                        | 0.626 | 52.643 |
| Trinidad and Tobago          | 0.636 | 52.417 |
| Tunisia                      | 0.757 | 55.517 |
| Turkey                       | 0.672 | 68.106 |
| Turkmenistan                 | 0.748 | 69.210 |
| Tuvalu                       | 0.670 | 44.013 |
| Uganda                       | 0.589 | 39.570 |
| Ukraine                      | 0.404 | 52.748 |
| United Arab Emirates         | 0.736 | 56.752 |
| United Kingdom               | 0.880 | 63.357 |
| Tanzania                     | 0.847 | 87.900 |
| United States of America     | 0.859 | 82.138 |
| United States Virgin Islands | 0.799 | 53.715 |
| Uruguay                      | 0.697 | 68.530 |
| Uzbekistan                   | 0.631 | 42.185 |
| Vanuatu                      | 0.485 | 34.084 |
| Venezuela                    | 0.607 | 60.968 |
| Viet Nam                     | 0.617 | 59.707 |
| Yemen                        | 0.412 | 49.046 |
| Zambia                       | 0.505 | 52.694 |
| Zimbabwe                     | 0.476 | 54.461 |

SDI: socio-demographic index; UHC: universal health coverage.

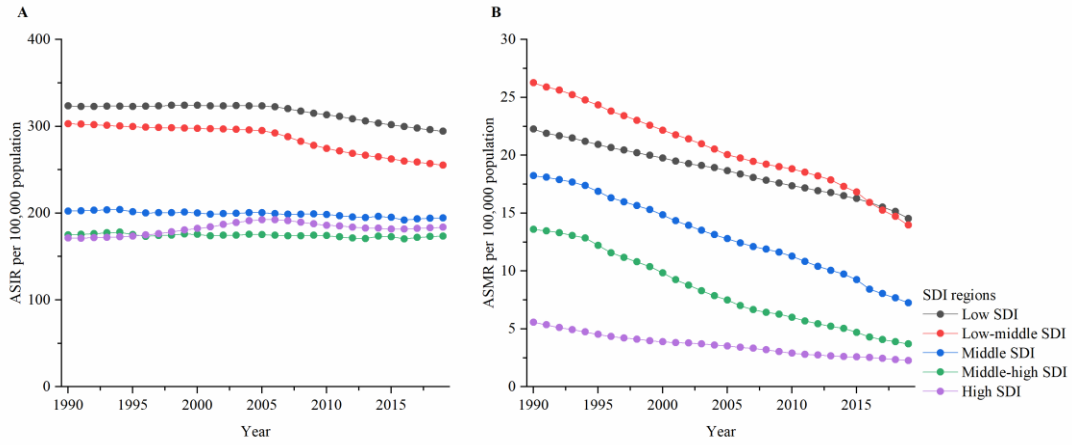

**Figure 1.** The ASIRs and ASMRs of neonatal preterm birth by SDI regions, from 1990 to 2019.

Note: ASIR: age-standardized incidence rate; ASMR: age-standardized mortality rate; SDI: socio-demographic index.

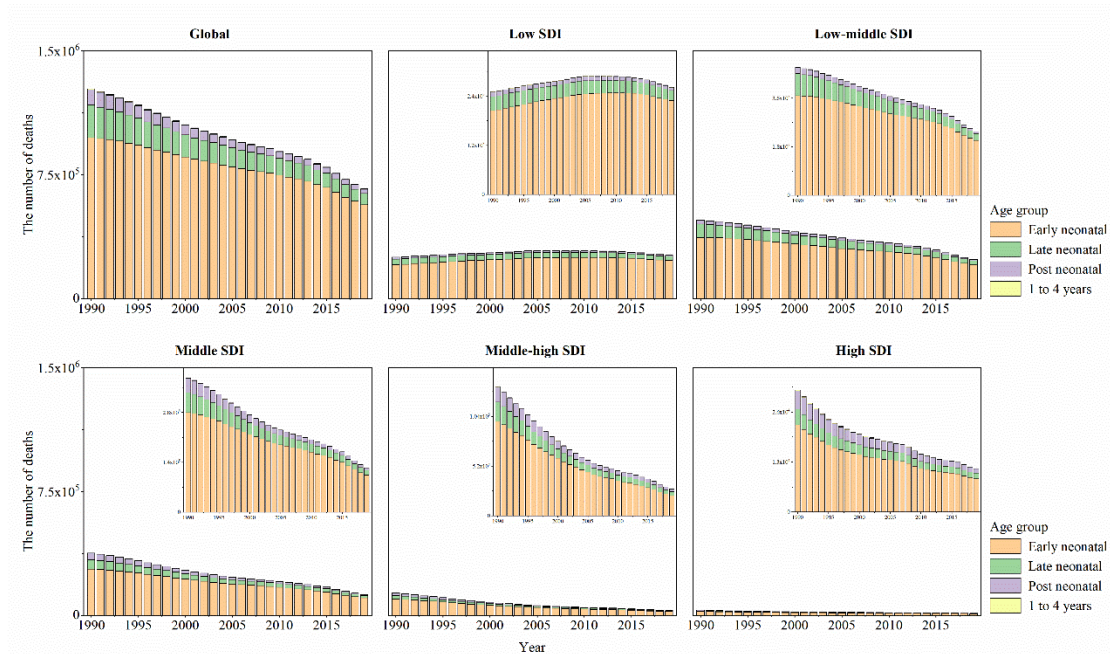

**Figure 2.** The deaths number of neonatal preterm birth by age group, by SDI regions, from 1990 to 2019.

Note: SDI: socio-demographic index.

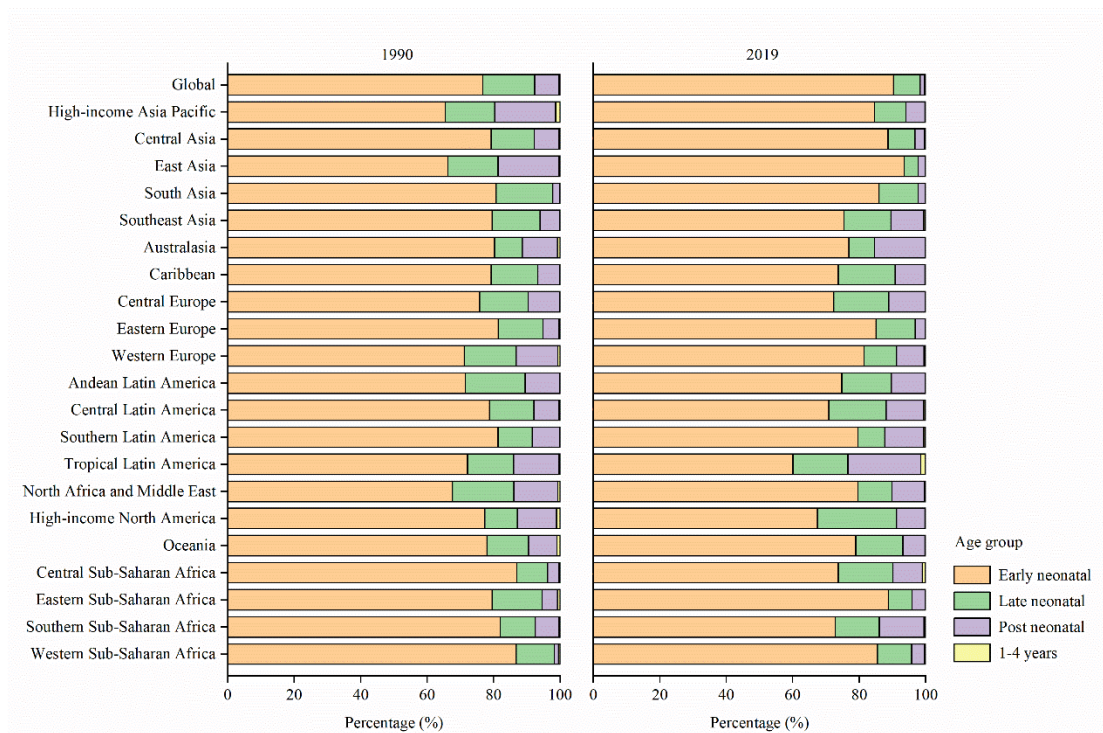

**eFigure 3.** The age distribution of deaths of neonatal preterm birth by GBD region in 1990 and 2019.

Note: GBD: Global Burden of Disease.



**eTable 2. The incident cases and ASIRs of neonatal preterm birth in 1990 and 2019 and their change trends from 1990 to 2019 at national level.**

| Nation                 | 1990                                             |                                  | 2019                                             |                                  | 1990-2019                                              |                              |
|------------------------|--------------------------------------------------|----------------------------------|--------------------------------------------------|----------------------------------|--------------------------------------------------------|------------------------------|
|                        | Incident cases<br>No. x 10 <sup>3</sup> (95% UI) | ASIR per 100,000<br>No. (95% UI) | Incident cases<br>No. x 10 <sup>3</sup> (95% UI) | ASIR per 100,000<br>No. (95% UI) | Percentage of relative change<br>in incident cases (%) | EAPC of ASIR<br>No. (95% CI) |
| Afghanistan            | 112.52 (106.67, 117.95)                          | 453.06 (429.53, 474.93)          | 297.92 (280.61, 315.54)                          | 419.12 (394.77, 443.91)          | 164.78                                                 | -0.12 (-0.32, 0.08)          |
| Albania                | 7.00 (6.52, 7.50)                                | 170.16 (158.43, 182.38)          | 2.26 (2.09, 2.42)                                | 134.49 (124.29, 143.96)          | -67.71                                                 | -1.07 (-1.19, -0.96)         |
| Algeria                | 54.97 (50.85, 59.28)                             | 148.87 (137.70, 160.55)          | 60.60 (55.67, 65.87)                             | 144.56 (132.80, 157.13)          | 10.24                                                  | -0.22 (-0.27, -0.17)         |
| American Samoa         | 0.16 (0.15, 0.17)                                | 196.08 (182.59, 210.19)          | 0.09 (0.09, 0.10)                                | 183.21 (171.85, 195.48)          | -42.36                                                 | -0.25 (-0.26, -0.23)         |
| Andorra                | 0.04 (0.04, 0.04)                                | 160.27 (147.69, 172.73)          | 0.04 (0.04, 0.05)                                | 190.23 (177.59, 203.44)          | 5.98                                                   | 0.70 (0.54, 0.87)            |
| Angola                 | 67.27 (63.19, 71.74)                             | 276.58 (259.77, 294.96)          | 128.69 (120.60, 136.62)                          | 242.98 (227.72, 257.97)          | 91.29                                                  | -0.40 (-0.45, -0.35)         |
| Antigua and Barbuda    | 0.13 (0.12, 0.14)                                | 205.79 (191.13, 220.55)          | 0.10 (0.10, 0.11)                                | 219.95 (204.96, 235.86)          | -21.75                                                 | 0.26 (0.24, 0.28)            |
| Argentina              | 33.60 (28.14, 39.56)                             | 101.08 (84.66, 119.01)           | 34.85 (32.43, 37.30)                             | 104.69 (97.42, 112.06)           | 3.71                                                   | 0.17 (0.14, 0.20)            |
| Armenia                | 6.57 (6.12, 7.02)                                | 180.72 (168.13, 193.05)          | 3.28 (3.08, 3.46)                                | 181.98 (171.10, 192.30)          | -50.13                                                 | -0.04 (-0.13, 0.04)          |
| Australia              | 17.87 (16.92, 18.92)                             | 144.78 (137.08, 153.28)          | 22.58 (21.05, 24.08)                             | 152.51 (142.19, 162.64)          | 26.35                                                  | 0.20 (0.10, 0.30)            |
| Austria                | 6.10 (5.62, 6.60)                                | 136.42 (125.72, 147.45)          | 6.00 (5.57, 6.45)                                | 141.29 (131.20, 151.87)          | -1.66                                                  | 0.11 (0.09, 0.12)            |
| Azerbaijan             | 18.60 (17.37, 19.74)                             | 204.30 (190.74, 216.85)          | 12.41 (11.70, 13.19)                             | 180.45 (170.04, 191.73)          | -33.26                                                 | -0.53 (-0.66, -0.40)         |
| Bahamas                | 0.55 (0.51, 0.58)                                | 211.32 (196.71, 225.76)          | 0.43 (0.41, 0.46)                                | 218.02 (204.29, 232.46)          | -20.71                                                 | 0.03 (-0.01, 0.07)           |
| Bahrain                | 1.04 (0.97, 1.12)                                | 158.99 (148.54, 170.69)          | 1.49 (1.41, 1.59)                                | 240.45 (227.21, 255.55)          | 43.09                                                  | 1.84 (1.69, 1.99)            |
| Bangladesh             | 740.51 (695.22, 782.46)                          | 392.97 (368.94, 415.23)          | 446.40 (419.88, 471.49)                          | 346.44 (325.86, 365.92)          | -39.72                                                 | -0.50 (-0.60, -0.40)         |
| Barbados               | 0.45 (0.42, 0.48)                                | 225.10 (210.72, 239.40)          | 0.32 (0.30, 0.34)                                | 229.68 (214.68, 245.12)          | -30.27                                                 | 0.05 (0.04, 0.06)            |
| Belarus                | 7.10 (6.25, 7.98)                                | 105.02 (92.36, 118.01)           | 5.58 (5.13, 6.03)                                | 112.85 (103.75, 121.87)          | -21.42                                                 | 0.29 (0.27, 0.32)            |
| Belgium                | 9.92 (9.22, 10.62)                               | 164.69 (153.05, 176.26)          | 9.93 (9.21, 10.62)                               | 168.04 (155.95, 179.83)          | 0.09                                                   | 0.02 (-0.01, 0.05)           |
| Belize                 | 0.65 (0.60, 0.69)                                | 228.81 (213.34, 244.07)          | 0.81 (0.76, 0.87)                                | 221.50 (206.16, 237.91)          | 26.01                                                  | -0.02 (-0.08, 0.04)          |
| Benin                  | 29.74 (27.98, 31.63)                             | 260.76 (245.31, 277.28)          | 53.16 (50.01, 56.22)                             | 220.53 (207.48, 233.21)          | 78.74                                                  | -0.74 (-0.84, -0.65)         |
| Bermuda                | 0.09 (0.09, 0.10)                                | 215.45 (200.75, 230.61)          | 0.06 (0.05, 0.06)                                | 235.67 (221.35, 249.73)          | -37.34                                                 | 0.35 (0.32, 0.38)            |
| Bhutan                 | 3.66 (3.40, 3.92)                                | 346.81 (322.00, 371.24)          | 1.69 (1.59, 1.80)                                | 263.53 (246.95, 280.47)          | -53.79                                                 | -1.07 (-1.13, -1.02)         |
| Bolivia                | 19.55 (18.22, 20.99)                             | 167.81 (156.39, 180.18)          | 23.07 (21.16, 25.00)                             | 149.35 (136.98, 161.88)          | 18                                                     | -0.35 (-0.40, -0.30)         |
| Bosnia and Herzegovina | 5.63 (5.28, 6.00)                                | 172.14 (161.55, 183.46)          | 1.97 (1.84, 2.10)                                | 153.03 (142.86, 163.09)          | -64.97                                                 | -0.74 (-0.90, -0.58)         |
| Botswana               | 7.10 (6.74, 7.51)                                | 363.18 (344.74, 383.98)          | 7.68 (7.23, 8.15)                                | 332.34 (313.21, 352.78)          | 8.05                                                   | -0.31 (-0.38, -0.24)         |
| Brazil                 | 401.64 (394.30, 409.87)                          | 243.42 (238.97, 248.41)          | 360.10 (354.83, 365.73)                          | 242.58 (239.03, 246.37)          | -10.34                                                 | 0.03 (0.01, 0.06)            |

|                                  |                            |                         |                         |                         |        |                      |
|----------------------------------|----------------------------|-------------------------|-------------------------|-------------------------|--------|----------------------|
| Brunei                           | 0.44 (0.41, 0.47)          | 130.22 (120.46, 140.56) | 0.44 (0.41, 0.47)       | 143.13 (132.84, 154.46) | -0.27  | 0.36 (0.32, 0.39)    |
| Bulgaria                         | 7.05 (6.55, 7.60)          | 149.12 (138.52, 160.71) | 4.30 (4.01, 4.59)       | 149.14 (139.23, 159.29) | -39    | 0.04 (0.00, 0.07)    |
| Burkina Faso                     | 75.25 (70.89, 79.56)       | 342.27 (322.45, 361.85) | 143.66 (134.75, 152.47) | 319.73 (299.90, 339.33) | 90.91  | -0.56 (-0.66, -0.46) |
| Burundi                          | 35.06 (32.82, 37.42)       | 277.04 (259.30, 295.68) | 52.15 (49.12, 55.37)    | 233.83 (220.26, 248.28) | 48.73  | -0.76 (-0.87, -0.65) |
| Cambodia                         | 69.02 (64.65, 73.34)       | 329.09 (308.23, 349.66) | 42.80 (40.04, 45.51)    | 243.78 (228.02, 259.21) | -37.99 | -1.47 (-1.67, -1.28) |
| Cameroon                         | 42.14 (39.60, 44.81)       | 189.09 (177.66, 201.03) | 79.72 (74.25, 85.16)    | 184.49 (171.83, 197.09) | 89.15  | -0.07 (-0.14, 0.01)  |
| Canada                           | 30.31 (28.44, 32.23)       | 155.28 (145.72, 165.14) | 29.36 (27.45, 31.25)    | 162.33 (151.75, 172.79) | -3.14  | 0.17 (0.15, 0.18)    |
| Cape Verde                       | 1.50 (1.40, 1.60)          | 265.87 (248.39, 283.86) | 1.19 (1.11, 1.27)       | 230.82 (216.54, 246.17) | -20.86 | -0.55 (-0.58, -0.52) |
| Central African Republic         | 17.67 (16.67, 18.84)       | 292.59 (276.04, 311.91) | 26.19 (24.60, 27.73)    | 277.89 (261.04, 294.18) | 48.22  | -0.20 (-0.25, -0.15) |
| Chad                             | 32.75 (30.61, 34.79)       | 215.24 (201.17, 228.69) | 79.48 (74.28, 84.55)    | 210.56 (196.80, 223.99) | 142.7  | 0.01 (-0.05, 0.08)   |
| Chile                            | 18.25 (17.04, 19.50)       | 127.74 (119.28, 136.51) | 16.08 (15.02, 17.17)    | 147.73 (137.96, 157.69) | -11.88 | 0.69 (0.60, 0.78)    |
| China                            | 1815.02 (1785.89, 1846.71) | 157.47 (154.95, 160.22) | 945.30 (930.07, 961.07) | 132.00 (129.87, 134.20) | -47.92 | -0.78 (-0.92, -0.64) |
| Colombia                         | 64.76 (60.35, 69.34)       | 144.76 (134.90, 154.99) | 85.30 (80.48, 90.32)    | 224.46 (211.77, 237.66) | 31.71  | 1.57 (1.42, 1.73)    |
| Comoros                          | 3.81 (3.61, 4.00)          | 403.21 (382.46, 423.41) | 3.02 (2.85, 3.19)       | 381.58 (360.47, 403.14) | -20.72 | -0.14 (-0.17, -0.10) |
| Congo                            | 12.95 (12.11, 13.80)       | 270.92 (253.38, 288.68) | 17.35 (16.20, 18.56)    | 252.02 (235.24, 269.61) | 34.01  | -0.21 (-0.25, -0.18) |
| Cook Islands                     | 0.04 (0.04, 0.05)          | 193.23 (180.65, 206.50) | 0.02 (0.02, 0.03)       | 185.46 (172.51, 198.80) | -45.53 | -0.14 (-0.19, -0.09) |
| Costa Rica                       | 6.21 (5.80, 6.67)          | 159.75 (149.07, 171.47) | 5.14 (4.80, 5.54)       | 161.22 (150.54, 173.67) | -17.23 | 0.05 (0.03, 0.07)    |
| Cote d'Ivoire                    | 104.39 (98.29, 110.31)     | 382.03 (359.70, 403.67) | 149.00 (139.92, 157.87) | 352.53 (331.03, 373.50) | 42.74  | -0.13 (-0.23, -0.03) |
| Croatia                          | 3.05 (2.80, 3.31)          | 113.68 (104.42, 123.57) | 2.13 (1.97, 2.30)       | 124.11 (114.53, 134.03) | -30.06 | 0.35 (0.31, 0.39)    |
| Cuba                             | 16.45 (15.61, 17.30)       | 189.16 (179.46, 198.97) | 6.70 (6.22, 7.18)       | 133.31 (123.69, 142.78) | -59.26 | -1.47 (-1.72, -1.22) |
| Cyprus                           | 0.92 (0.85, 0.99)          | 138.71 (127.99, 150.34) | 1.04 (0.96, 1.12)       | 142.26 (131.14, 152.98) | 13.23  | 0.15 (0.11, 0.20)    |
| Czech Republic                   | 8.59 (8.07, 9.14)          | 139.55 (131.15, 148.47) | 8.97 (8.46, 9.46)       | 170.30 (160.67, 179.72) | 4.4    | 1.05 (0.87, 1.24)    |
| Democratic Republic of the Congo | 184.32 (172.99, 195.51)    | 205.97 (193.31, 218.48) | 268.30 (250.41, 287.44) | 191.98 (179.18, 205.68) | 45.56  | -0.18 (-0.28, -0.08) |
| Denmark                          | 3.60 (3.31, 3.90)          | 117.61 (108.00, 127.41) | 3.73 (3.46, 4.02)       | 122.61 (113.75, 132.00) | 3.76   | 0.19 (0.16, 0.21)    |
| Djibouti                         | 2.78 (2.60, 2.97)          | 262.91 (245.81, 280.18) | 4.16 (3.90, 4.43)       | 251.17 (235.69, 267.48) | 49.37  | -0.30 (-0.37, -0.23) |
| Dominica                         | 0.18 (0.17, 0.20)          | 225.06 (209.54, 241.67) | 0.09 (0.08, 0.09)       | 214.57 (201.21, 228.02) | -53.53 | -0.18 (-0.22, -0.14) |
| Dominican Republic               | 33.57 (31.27, 35.90)       | 293.14 (273.06, 313.46) | 34.91 (32.65, 37.09)    | 319.20 (298.47, 339.07) | 3.99   | 0.39 (0.34, 0.45)    |
| Ecuador                          | 22.05 (20.46, 23.93)       | 153.61 (142.53, 166.68) | 24.71 (23.24, 26.27)    | 147.34 (138.56, 156.66) | 12.04  | -0.12 (-0.24, 0.00)  |
| Egypt                            | 308.23 (288.88, 327.51)    | 340.67 (319.28, 361.98) | 358.64 (339.29, 377.49) | 353.18 (334.13, 371.75) | 16.35  | 0.20 (0.12, 0.28)    |
| El Salvador                      | 16.71 (15.56, 17.81)       | 212.66 (198.01, 226.66) | 10.98 (10.31, 11.71)    | 203.48 (191.10, 217.11) | -34.31 | -0.21 (-0.25, -0.17) |

|                                |                            |                         |                            |                         |        |                      |
|--------------------------------|----------------------------|-------------------------|----------------------------|-------------------------|--------|----------------------|
| Equatorial Guinea              | 3.39 (3.18, 3.61)          | 309.45 (290.65, 329.33) | 4.19 (3.91, 4.47)          | 226.03 (211.20, 241.58) | 23.49  | -1.25 (-1.41, -1.09) |
| Eritrea                        | 22.64 (21.29, 24.16)       | 381.51 (358.79, 407.16) | 28.44 (26.61, 30.29)       | 298.49 (279.25, 317.88) | 25.61  | -0.48 (-0.59, -0.37) |
| Estonia                        | 1.14 (1.05, 1.22)          | 110.07 (102.22, 118.10) | 0.75 (0.70, 0.80)          | 117.14 (109.10, 125.37) | -33.97 | 0.17 (0.09, 0.25)    |
| Eswatini                       | 3.17 (2.97, 3.37)          | 207.71 (194.31, 220.63) | 2.56 (2.40, 2.71)          | 182.09 (170.53, 192.89) | -19.22 | -0.46 (-0.49, -0.44) |
| Ethiopia                       | 348.86 (337.68, 359.84)    | 294.26 (284.83, 303.52) | 478.30 (462.80, 494.39)    | 273.26 (264.41, 282.45) | 37.1   | -0.24 (-0.45, -0.04) |
| Federated States of Micronesia | 0.33 (0.31, 0.35)          | 197.42 (184.17, 212.59) | 0.17 (0.16, 0.18)          | 182.34 (170.16, 195.76) | -48.2  | -0.23 (-0.28, -0.19) |
| Fiji                           | 1.63 (1.52, 1.74)          | 178.66 (166.71, 191.20) | 1.45 (1.35, 1.56)          | 173.08 (161.03, 185.65) | -10.66 | -0.12 (-0.14, -0.11) |
| Finland                        | 3.36 (3.12, 3.61)          | 105.98 (98.28, 113.72)  | 2.97 (2.77, 3.17)          | 123.11 (114.84, 131.29) | -11.58 | 0.48 (0.41, 0.56)    |
| France                         | 33.09 (30.38, 35.84)       | 89.94 (82.57, 97.40)    | 33.16 (28.84, 37.69)       | 96.53 (83.93, 109.70)   | 0.22   | 0.23 (0.22, 0.25)    |
| Gabon                          | 5.52 (5.19, 5.87)          | 293.44 (276.22, 312.43) | 4.95 (4.66, 5.23)          | 242.35 (228.09, 256.36) | -10.33 | -0.79 (-0.96, -0.62) |
| Gambia                         | 6.70 (6.31, 7.10)          | 290.92 (274.04, 308.41) | 8.88 (8.31, 9.43)          | 260.86 (244.00, 276.91) | 32.62  | -0.40 (-0.41, -0.38) |
| Georgia                        | 5.32 (4.96, 5.71)          | 132.78 (123.75, 142.47) | 3.64 (3.46, 3.83)          | 166.32 (157.94, 174.82) | -31.57 | 0.64 (0.46, 0.83)    |
| Germany                        | 96.35 (90.89, 102.60)      | 224.78 (212.05, 239.36) | 84.49 (79.60, 89.88)       | 229.59 (216.31, 244.26) | -12.31 | -0.05 (-0.12, 0.02)  |
| Ghana                          | 71.26 (67.23, 75.92)       | 246.73 (232.77, 262.87) | 74.32 (69.91, 78.82)       | 182.08 (171.26, 193.10) | 4.3    | -1.28 (-1.37, -1.18) |
| Greece                         | 4.49 (4.12, 4.90)          | 89.70 (82.31, 97.99)    | 9.34 (8.80, 9.90)          | 225.63 (212.45, 239.02) | 108.26 | 3.91 (3.65, 4.18)    |
| Greenland                      | 0.12 (0.11, 0.13)          | 212.26 (197.96, 226.49) | 0.08 (0.07, 0.08)          | 206.84 (192.85, 221.22) | -35.08 | 0.00 (-0.11, 0.11)   |
| Grenada                        | 0.20 (0.18, 0.21)          | 208.69 (193.59, 225.10) | 0.14 (0.13, 0.15)          | 215.88 (201.29, 231.34) | -27.55 | 0.12 (0.10, 0.13)    |
| Guam                           | 0.34 (0.32, 0.36)          | 187.90 (174.49, 201.51) | 0.29 (0.26, 0.31)          | 182.60 (169.06, 195.75) | -15.99 | -0.17 (-0.19, -0.14) |
| Guatemala                      | 46.43 (43.79, 49.09)       | 287.41 (271.10, 303.87) | 56.98 (53.31, 60.88)       | 288.20 (269.67, 307.94) | 22.72  | 0.15 (0.02, 0.27)    |
| Guinea                         | 39.28 (36.76, 41.79)       | 260.00 (243.37, 276.65) | 55.59 (52.23, 59.15)       | 242.54 (227.84, 258.04) | 41.54  | -0.28 (-0.35, -0.20) |
| Guinea-Bissau                  | 8.65 (8.15, 9.16)          | 388.26 (365.60, 410.72) | 10.68 (10.10, 11.22)       | 357.85 (338.52, 375.91) | 23.36  | -0.25 (-0.26, -0.24) |
| Guyana                         | 4.30 (4.04, 4.55)          | 404.30 (380.38, 427.82) | 2.53 (2.39, 2.68)          | 368.60 (348.06, 390.93) | -41.16 | -0.32 (-0.36, -0.28) |
| Haiti                          | 50.58 (47.89, 53.37)       | 428.03 (405.33, 451.66) | 62.35 (58.71, 66.39)       | 393.89 (370.87, 419.40) | 23.29  | -0.41 (-0.46, -0.37) |
| Honduras                       | 23.54 (21.79, 25.23)       | 273.60 (253.23, 293.26) | 26.19 (24.44, 28.19)       | 232.32 (216.85, 250.12) | 11.26  | -0.75 (-0.87, -0.63) |
| Hungary                        | 10.47 (9.84, 11.16)        | 175.73 (165.21, 187.39) | 7.32 (6.91, 7.74)          | 184.32 (174.05, 194.95) | -30.09 | 0.17 (0.14, 0.19)    |
| Iceland                        | 0.30 (0.28, 0.33)          | 136.08 (126.35, 146.65) | 0.30 (0.28, 0.32)          | 144.24 (134.35, 154.11) | -2.48  | 0.25 (0.21, 0.28)    |
| India                          | 4099.16 (4015.01, 4195.24) | 325.58 (318.90, 333.21) | 3103.78 (3034.23, 3172.23) | 275.62 (269.45, 281.70) | -24.28 | -0.61 (-0.71, -0.51) |
| Indonesia                      | 460.42 (451.83, 468.88)    | 201.51 (197.75, 205.21) | 316.90 (310.95, 322.78)    | 171.99 (168.77, 175.19) | -31.17 | -0.51 (-0.58, -0.44) |
| Iran                           | 161.70 (158.42, 164.82)    | 188.86 (185.02, 192.50) | 123.82 (121.15, 126.49)    | 191.47 (187.35, 195.59) | -23.43 | -0.10 (-0.15, -0.05) |
| Iraq                           | 94.79 (88.55, 101.19)      | 282.17 (263.58, 301.23) | 116.29 (108.54, 124.56)    | 252.90 (236.05, 270.88) | 22.68  | -0.13 (-0.24, -0.01) |

|                  |                         |                         |  |                         |                         |  |        |                      |
|------------------|-------------------------|-------------------------|--|-------------------------|-------------------------|--|--------|----------------------|
| Ireland          | 2.64 (2.43, 2.89)       | 102.21 (94.21, 111.88)  |  | 3.76 (3.50, 4.02)       | 129.25 (120.18, 138.15) |  | 42.65  | 0.90 (0.67, 1.12)    |
| Israel           | 6.46 (5.94, 6.99)       | 129.24 (118.86, 139.84) |  | 12.87 (11.92, 13.87)    | 137.71 (127.55, 148.44) |  | 99.07  | 0.23 (0.21, 0.25)    |
| Italy            | 44.49 (43.37, 45.63)    | 165.89 (161.74, 170.17) |  | 35.78 (34.92, 36.73)    | 167.43 (163.41, 171.88) |  | -19.56 | -0.06 (-0.16, 0.03)  |
| Jamaica          | 6.78 (6.35, 7.29)       | 252.04 (235.83, 270.84) |  | 4.22 (3.95, 4.51)       | 243.97 (228.01, 260.25) |  | -37.71 | -0.03 (-0.08, 0.02)  |
| Japan            | 66.64 (65.40, 67.85)    | 112.32 (110.23, 114.37) |  | 55.24 (54.26, 56.22)    | 127.16 (124.90, 129.40) |  | -17.1  | 0.54 (0.43, 0.65)    |
| Jordan           | 17.22 (16.18, 18.28)    | 262.92 (247.07, 279.06) |  | 33.51 (31.35, 35.74)    | 283.60 (265.35, 302.51) |  | 94.59  | 0.31 (0.21, 0.42)    |
| Kazakhstan       | 26.92 (24.98, 28.86)    | 158.16 (146.75, 169.56) |  | 22.25 (20.62, 23.94)    | 131.34 (121.76, 141.33) |  | -17.36 | -0.88 (-0.98, -0.77) |
| Kenya            | 112.38 (111.19, 113.64) | 234.66 (232.19, 237.30) |  | 144.92 (143.11, 146.57) | 225.15 (222.34, 227.72) |  | 28.96  | -0.15 (-0.27, -0.03) |
| Kiribati         | 0.24 (0.23, 0.26)       | 198.12 (184.98, 211.49) |  | 0.28 (0.26, 0.29)       | 190.09 (178.08, 202.73) |  | 12.68  | -0.05 (-0.09, -0.01) |
| Kuwait           | 3.95 (3.69, 4.22)       | 216.03 (201.89, 230.45) |  | 6.40 (5.99, 6.82)       | 217.42 (203.43, 231.78) |  | 61.85  | 0.18 (0.11, 0.25)    |
| Kyrgyzstan       | 7.88 (7.27, 8.53)       | 130.23 (120.10, 141.07) |  | 9.30 (8.61, 10.00)      | 133.25 (123.29, 143.35) |  | 18.06  | 0.13 (0.10, 0.17)    |
| Lao              | 16.98 (15.92, 18.14)    | 213.33 (200.00, 227.86) |  | 15.51 (14.54, 16.47)    | 189.00 (177.15, 200.71) |  | -8.67  | -0.26 (-0.44, -0.08) |
| Latvia           | 2.05 (1.88, 2.23)       | 116.48 (106.92, 126.83) |  | 1.12 (1.03, 1.21)       | 120.81 (111.65, 130.70) |  | -45.47 | 0.17 (0.11, 0.23)    |
| Lebanon          | 9.33 (8.71, 10.00)      | 177.36 (165.58, 189.97) |  | 9.58 (8.91, 10.23)      | 189.38 (176.14, 202.23) |  | 2.66   | 0.20 (0.08, 0.32)    |
| Lesotho          | 9.07 (8.52, 9.60)       | 313.30 (294.21, 331.39) |  | 5.69 (5.34, 6.04)       | 256.56 (241.05, 272.30) |  | -37.32 | -0.73 (-0.76, -0.71) |
| Liberia          | 14.65 (13.81, 15.45)    | 380.99 (359.23, 401.87) |  | 21.59 (20.36, 22.94)    | 335.68 (316.46, 356.59) |  | 47.4   | -0.26 (-0.39, -0.12) |
| Libya            | 15.33 (14.31, 16.41)    | 213.49 (199.34, 228.64) |  | 7.95 (7.39, 8.55)       | 203.08 (188.59, 218.34) |  | -48.11 | -0.08 (-0.20, 0.03)  |
| Lithuania        | 3.24 (2.98, 3.51)       | 120.20 (110.35, 130.29) |  | 1.58 (1.47, 1.69)       | 121.68 (113.18, 130.25) |  | -51.24 | 0.09 (0.03, 0.15)    |
| Luxembourg       | 0.31 (0.29, 0.34)       | 129.64 (119.42, 140.88) |  | 0.44 (0.41, 0.48)       | 139.01 (128.73, 149.96) |  | 42.22  | 0.21 (0.17, 0.25)    |
| Macedonia        | 2.24 (2.06, 2.43)       | 132.77 (122.24, 144.46) |  | 1.44 (1.33, 1.55)       | 134.48 (124.47, 144.71) |  | -35.79 | 0.04 (-0.06, 0.14)   |
| Madagascar       | 85.33 (80.53, 89.88)    | 334.70 (315.88, 352.57) |  | 143.53 (134.85, 152.89) | 350.25 (329.08, 373.09) |  | 68.21  | 0.28 (0.18, 0.39)    |
| Malawi           | 75.03 (71.39, 78.49)    | 336.49 (320.16, 352.01) |  | 78.79 (74.50, 83.34)    | 299.99 (283.65, 317.31) |  | 5.01   | -0.69 (-0.84, -0.53) |
| Malaysia         | 43.43 (40.54, 46.37)    | 181.76 (169.65, 194.04) |  | 49.02 (45.85, 52.24)    | 187.92 (175.78, 200.29) |  | 12.86  | 0.16 (0.13, 0.19)    |
| Maldives         | 1.06 (0.99, 1.13)       | 251.21 (234.45, 267.86) |  | 0.97 (0.92, 1.03)       | 239.70 (226.12, 253.60) |  | -8.21  | -0.22 (-0.32, -0.12) |
| Mali             | 78.40 (74.05, 82.92)    | 369.52 (348.99, 390.79) |  | 172.58 (163.19, 182.61) | 374.04 (353.67, 395.78) |  | 120.12 | 0.16 (0.08, 0.24)    |
| Malta            | 0.40 (0.38, 0.43)       | 148.92 (139.34, 158.97) |  | 0.32 (0.30, 0.34)       | 156.26 (146.99, 165.68) |  | -19.69 | 0.27 (0.13, 0.41)    |
| Marshall Islands | 0.13 (0.12, 0.14)       | 177.60 (164.58, 190.00) |  | 0.10 (0.10, 0.11)       | 172.70 (160.91, 184.20) |  | -20.99 | -0.03 (-0.08, 0.02)  |
| Mauritania       | 12.22 (11.46, 13.02)    | 286.25 (268.39, 304.95) |  | 12.98 (12.14, 13.86)    | 247.46 (231.52, 264.19) |  | 6.2    | -0.56 (-0.61, -0.52) |
| Mauritius        | 1.93 (1.79, 2.08)       | 179.16 (165.60, 192.66) |  | 1.15 (1.07, 1.24)       | 187.18 (173.98, 200.97) |  | -40.26 | 0.14 (0.13, 0.16)    |
| Mexico           | 191.33 (187.09, 195.71) | 160.69 (157.13, 164.37) |  | 156.64 (153.33, 159.90) | 155.73 (152.45, 158.98) |  | -18.13 | -0.16 (-0.26, -0.07) |

|                          |                         |                         |                           |                         |        |                      |
|--------------------------|-------------------------|-------------------------|---------------------------|-------------------------|--------|----------------------|
| Moldova                  | 4.95 (4.57, 5.34)       | 133.77 (123.45, 144.16) | 2.10 (1.96, 2.25)         | 135.77 (126.68, 145.69) | -57.63 | 0.02 (-0.00, 0.05)   |
| Monaco                   | 0.02 (0.02, 0.02)       | 158.21 (146.86, 170.29) | 0.02 (0.02, 0.02)         | 125.43 (115.34, 135.69) | -7.66  | -0.84 (-0.89, -0.78) |
| Mongolia                 | 4.80 (4.43, 5.23)       | 137.19 (126.66, 149.47) | 5.20 (4.66, 5.76)         | 135.23 (121.08, 149.66) | 8.35   | -0.10 (-0.16, -0.04) |
| Montenegro               | 0.55 (0.51, 0.60)       | 115.44 (105.28, 125.21) | 0.38 (0.35, 0.41)         | 119.05 (110.32, 128.31) | -30.96 | 0.08 (0.07, 0.10)    |
| Morocco                  | 108.81 (101.25, 116.80) | 286.79 (266.88, 307.86) | 74.12 (69.15, 79.53)      | 256.93 (239.70, 275.68) | -31.88 | -0.32 (-0.36, -0.27) |
| Mozambique               | 95.78 (90.64, 100.75)   | 341.88 (323.51, 359.61) | 112.71 (106.20, 119.59)   | 209.60 (197.51, 222.41) | 17.67  | -1.82 (-2.05, -1.58) |
| Myanmar                  | 146.05 (136.72, 155.78) | 229.70 (215.02, 245.01) | 103.34 (96.54, 110.57)    | 206.59 (193.00, 221.04) | -29.24 | -0.19 (-0.29, -0.09) |
| Namibia                  | 7.66 (7.21, 8.11)       | 330.05 (310.71, 349.36) | 9.77 (9.13, 10.42)        | 326.03 (304.88, 347.72) | 27.53  | 0.07 (0.03, 0.10)    |
| Nauru                    | 0.04 (0.03, 0.04)       | 188.31 (174.97, 202.69) | 0.03 (0.02, 0.03)         | 180.85 (167.96, 193.76) | -31.52 | -0.20 (-0.24, -0.15) |
| Nepal                    | 158.41 (149.06, 167.98) | 405.91 (381.95, 430.43) | 94.27 (89.04, 99.64)      | 319.82 (302.08, 338.04) | -40.49 | -1.08 (-1.29, -0.88) |
| Netherlands              | 12.93 (11.94, 13.89)    | 135.79 (125.36, 145.87) | 12.44 (11.49, 13.39)      | 144.46 (133.51, 155.50) | -3.81  | 0.29 (0.27, 0.31)    |
| New Zealand              | 3.78 (3.57, 3.99)       | 131.51 (124.22, 138.73) | 4.55 (4.32, 4.78)         | 159.42 (151.11, 167.39) | 20.35  | 0.67 (0.51, 0.83)    |
| Nicaragua                | 15.95 (14.79, 17.08)    | 231.37 (214.52, 247.87) | 12.08 (11.01, 13.31)      | 192.04 (175.04, 211.71) | -24.28 | -0.65 (-0.89, -0.40) |
| Niger                    | 83.75 (79.71, 87.78)    | 393.19 (374.20, 412.10) | 236.27 (223.21, 249.66)   | 429.64 (405.89, 453.99) | 182.1  | 0.27 (0.09, 0.46)    |
| Nigeria                  | 535.55 (528.88, 541.92) | 270.83 (267.46, 274.05) | 910.26 (897.70, 923.77)   | 252.26 (248.78, 256.00) | 69.97  | -0.21 (-0.24, -0.17) |
| Niue                     | 0.00 (0.00, 0.01)       | 179.40 (167.54, 192.44) | 0.00 (0.00, 0.00)         | 179.79 (167.32, 192.31) | -52.94 | -0.12 (-0.18, -0.06) |
| North Korea              | 62.10 (57.67, 66.64)    | 180.29 (167.40, 193.46) | 28.68 (26.72, 30.82)      | 173.96 (162.06, 186.93) | -53.82 | -0.21 (-0.28, -0.15) |
| Northern Mariana Islands | 0.11 (0.11, 0.12)       | 183.71 (171.87, 196.29) | 0.05 (0.04, 0.05)         | 193.39 (180.14, 206.69) | -59.66 | 0.15 (0.06, 0.25)    |
| Norway                   | 3.89 (3.81, 3.97)       | 134.15 (131.32, 137.08) | 3.71 (3.63, 3.81)         | 134.01 (130.85, 137.32) | -4.49  | -0.03 (-0.24, 0.19)  |
| Oman                     | 6.65 (6.17, 7.11)       | 209.58 (194.62, 223.95) | 7.84 (7.31, 8.42)         | 209.45 (195.35, 224.80) | 17.93  | -0.01 (-0.06, 0.04)  |
| Pakistan                 | 808.18 (774.57, 842.31) | 350.52 (335.94, 365.32) | 1038.47 (994.69, 1081.86) | 325.84 (312.10, 339.45) | 28.49  | -0.14 (-0.22, -0.07) |
| Palau                    | 0.03 (0.03, 0.04)       | 187.75 (173.92, 201.47) | 0.02 (0.02, 0.02)         | 188.61 (175.67, 203.05) | -49.03 | -0.03 (-0.06, 0.01)  |
| Palestine                | 9.15 (8.56, 9.76)       | 200.61 (187.78, 213.95) | 11.52 (10.66, 12.32)      | 192.25 (177.90, 205.57) | 25.96  | -0.14 (-0.20, -0.07) |
| Panama                   | 5.43 (5.08, 5.79)       | 191.59 (179.04, 204.18) | 6.90 (6.47, 7.33)         | 187.63 (175.93, 199.55) | 26.89  | -0.05 (-0.09, -0.01) |
| Papua New Guinea         | 15.11 (13.99, 16.26)    | 211.81 (196.11, 227.94) | 32.07 (29.69, 34.38)      | 204.53 (189.37, 219.29) | 112.24 | -0.14 (-0.19, -0.08) |
| Paraguay                 | 12.04 (11.21, 12.83)    | 196.21 (182.65, 209.05) | 10.64 (9.94, 11.33)       | 175.63 (164.00, 186.96) | -11.62 | -0.44 (-0.55, -0.33) |
| Peru                     | 68.37 (64.02, 72.95)    | 215.32 (201.62, 229.75) | 60.24 (56.53, 63.87)      | 196.48 (184.39, 208.35) | -11.89 | -0.56 (-0.70, -0.42) |
| Philippines              | 232.72 (229.29, 236.45) | 234.77 (231.32, 238.54) | 251.47 (247.68, 255.49)   | 198.09 (195.11, 201.26) | 8.06   | -0.53 (-0.60, -0.46) |
| Poland                   | 36.13 (35.28, 37.10)    | 140.10 (136.80, 143.85) | 26.17 (25.64, 26.71)      | 149.87 (146.85, 152.99) | -27.58 | 0.21 (0.18, 0.23)    |
| Portugal                 | 6.96 (6.43, 7.53)       | 125.99 (116.41, 136.29) | 6.45 (6.00, 6.94)         | 167.89 (156.01, 180.52) | -7.3   | 1.03 (0.95, 1.11)    |

|                                  |                         |                         |  |                         |                         |  |        |                      |
|----------------------------------|-------------------------|-------------------------|--|-------------------------|-------------------------|--|--------|----------------------|
| Puerto Rico                      | 6.81 (6.35, 7.28)       | 216.13 (201.58, 230.78) |  | 2.83 (2.65, 3.03)       | 233.48 (218.37, 249.85) |  | -58.42 | 0.32 (0.29, 0.35)    |
| Qatar                            | 1.37 (1.28, 1.45)       | 270.86 (254.41, 287.83) |  | 3.78 (3.55, 4.01)       | 288.40 (271.00, 305.80) |  | 176.95 | 0.27 (0.24, 0.31)    |
| Romania                          | 23.23 (21.65, 24.93)    | 162.81 (151.73, 174.73) |  | 14.92 (14.04, 15.81)    | 178.47 (167.94, 189.06) |  | -35.76 | 0.24 (0.15, 0.33)    |
| Russia                           | 161.73 (160.22, 163.34) | 174.22 (172.59, 175.95) |  | 145.63 (143.91, 147.29) | 181.44 (179.31, 183.52) |  | -9.96  | 0.18 (0.16, 0.21)    |
| Rwanda                           | 32.97 (30.87, 35.12)    | 216.59 (202.76, 230.73) |  | 28.12 (26.29, 29.95)    | 166.48 (155.62, 177.31) |  | -14.71 | -1.22 (-1.50, -0.95) |
| Saint Kitts and Nevis            | 0.09 (0.08, 0.10)       | 209.27 (195.24, 222.12) |  | 0.07 (0.07, 0.08)       | 220.55 (206.37, 235.48) |  | -18.48 | 0.20 (0.19, 0.21)    |
| Saint Lucia                      | 0.40 (0.37, 0.43)       | 220.19 (204.96, 235.17) |  | 0.19 (0.18, 0.20)       | 220.38 (205.13, 235.45) |  | -52.86 | 0.02 (0.01, 0.04)    |
| Saint Vincent and the Grenadines | 0.27 (0.26, 0.29)       | 215.51 (200.88, 229.57) |  | 0.15 (0.14, 0.16)       | 209.96 (195.83, 224.10) |  | -44.38 | -0.08 (-0.11, -0.05) |
| Samoa                            | 0.32 (0.30, 0.34)       | 194.96 (181.14, 209.26) |  | 0.35 (0.33, 0.38)       | 192.12 (179.01, 206.10) |  | 10.15  | 0.02 (-0.02, 0.06)   |
| San Marino                       | 0.02 (0.02, 0.02)       | 128.32 (118.81, 138.45) |  | 0.02 (0.02, 0.02)       | 141.54 (130.63, 151.86) |  | 26.55  | 0.35 (0.34, 0.37)    |
| Sao Tome and Principe            | 0.79 (0.74, 0.84)       | 353.08 (331.28, 375.52) |  | 0.66 (0.62, 0.70)       | 293.13 (275.40, 312.74) |  | -16.32 | -0.76 (-0.81, -0.71) |
| Saudi Arabia                     | 41.24 (38.45, 44.15)    | 160.47 (149.60, 171.80) |  | 35.31 (33.12, 37.76)    | 161.35 (151.34, 172.57) |  | -14.38 | 0.16 (0.04, 0.28)    |
| Senegal                          | 54.07 (51.07, 57.27)    | 329.85 (311.51, 349.34) |  | 72.88 (69.28, 76.76)    | 328.22 (312.01, 345.71) |  | 34.78  | 0.28 (0.16, 0.40)    |
| Serbia                           | 10.18 (9.39, 10.98)     | 159.30 (146.90, 171.80) |  | 5.68 (5.29, 6.09)       | 143.26 (133.46, 153.64) |  | -44.21 | -0.50 (-0.60, -0.40) |
| Seychelles                       | 0.15 (0.14, 0.16)       | 182.47 (169.93, 194.71) |  | 0.13 (0.13, 0.14)       | 187.47 (175.68, 199.82) |  | -9.6   | 0.13 (0.11, 0.15)    |
| Sierra Leone                     | 24.52 (23.01, 26.26)    | 325.51 (305.51, 348.71) |  | 36.01 (33.69, 38.31)    | 269.66 (252.24, 286.88) |  | 46.9   | -0.66 (-0.74, -0.59) |
| Singapore                        | 4.19 (3.93, 4.46)       | 170.81 (160.16, 181.86) |  | 5.18 (4.86, 5.48)       | 188.30 (176.52, 199.27) |  | 23.7   | 0.75 (0.43, 1.06)    |
| Slovakia                         | 5.41 (5.02, 5.83)       | 143.26 (132.77, 154.30) |  | 4.00 (3.73, 4.28)       | 149.37 (139.15, 159.82) |  | -26.09 | 0.18 (0.15, 0.20)    |
| Slovenia                         | 1.45 (1.35, 1.57)       | 136.49 (126.42, 147.45) |  | 1.33 (1.25, 1.42)       | 146.68 (137.27, 156.67) |  | -8.33  | 0.30 (0.27, 0.33)    |
| Solomon Islands                  | 1.41 (1.31, 1.50)       | 205.70 (191.16, 219.76) |  | 1.92 (1.78, 2.05)       | 191.86 (178.50, 204.87) |  | 36.19  | -0.29 (-0.35, -0.24) |
| Somalia                          | 46.03 (43.31, 48.81)    | 312.58 (294.09, 331.43) |  | 120.59 (112.64, 129.18) | 289.73 (270.63, 310.36) |  | 161.97 | -0.02 (-0.10, 0.06)  |
| South Africa                     | 139.20 (136.11, 142.61) | 298.37 (291.75, 305.67) |  | 146.08 (142.44, 149.61) | 295.59 (288.21, 302.71) |  | 4.94   | -0.06 (-0.09, -0.03) |
| South Korea                      | 42.03 (38.95, 45.07)    | 129.67 (120.19, 139.07) |  | 26.85 (25.04, 28.73)    | 136.33 (127.12, 145.89) |  | -36.11 | 0.27 (0.17, 0.36)    |
| South Sudan                      | 35.15 (32.99, 37.42)    | 292.58 (274.58, 311.49) |  | 46.23 (43.24, 49.45)    | 267.39 (250.11, 286.00) |  | 31.54  | -0.28 (-0.38, -0.18) |
| Spain                            | 39.05 (37.27, 41.03)    | 204.86 (195.51, 215.22) |  | 27.21 (25.45, 28.93)    | 154.32 (144.39, 164.10) |  | -30.34 | -0.70 (-0.85, -0.54) |
| Sri Lanka                        | 33.84 (31.61, 36.35)    | 197.47 (184.44, 212.13) |  | 28.50 (26.39, 30.70)    | 199.92 (185.09, 215.36) |  | -15.77 | 0.08 (0.05, 0.11)    |
| Sudan                            | 82.07 (76.15, 88.09)    | 176.07 (163.36, 188.98) |  | 90.23 (84.12, 96.44)    | 160.43 (149.57, 171.47) |  | 9.95   | -0.35 (-0.41, -0.29) |
| Suriname                         | 1.29 (1.20, 1.38)       | 295.54 (276.18, 316.86) |  | 1.18 (1.10, 1.26)       | 274.34 (256.12, 294.07) |  | -8.26  | -0.28 (-0.33, -0.23) |
| Sweden                           | 5.65 (5.27, 6.05)       | 94.32 (87.96, 101.01)   |  | 5.02 (4.66, 5.35)       | 87.86 (81.66, 93.80)    |  | -11.22 | -0.25 (-0.29, -0.20) |
| Switzerland                      | 6.07 (5.68, 6.48)       | 151.64 (141.84, 161.99) |  | 6.60 (6.15, 7.06)       | 154.90 (144.18, 165.51) |  | 8.82   | 0.03 (0.00, 0.05)    |

|                              |                         |                         |                         |                         |        |                      |
|------------------------------|-------------------------|-------------------------|-------------------------|-------------------------|--------|----------------------|
| Syrian Arab Republic         | 55.41 (51.62, 59.33)    | 229.58 (213.87, 245.80) | 22.83 (21.26, 24.31)    | 203.98 (189.99, 217.24) | -58.81 | -0.10 (-0.29, 0.09)  |
| Taiwan (Province of China)   | 28.39 (26.87, 30.09)    | 179.11 (169.50, 189.80) | 15.00 (14.03, 16.04)    | 176.57 (165.24, 188.85) | -47.18 | 0.17 (0.07, 0.28)    |
| Tajikistan                   | 21.24 (19.86, 22.54)    | 216.40 (202.36, 229.73) | 23.28 (21.74, 24.77)    | 190.95 (178.29, 203.14) | 9.64   | -0.50 (-0.58, -0.43) |
| Thailand                     | 166.71 (157.32, 176.31) | 286.79 (270.63, 303.31) | 204.77 (191.96, 217.59) | 207.52 (194.54, 220.51) | 22.83  | -0.98 (-1.13, -0.84) |
| Timor-Leste                  | 101.31 (94.70, 107.68)  | 199.21 (186.20, 211.73) | 57.10 (53.67, 60.82)    | 203.27 (191.06, 216.52) | -43.64 | 0.22 (0.08, 0.35)    |
| Togo                         | 6.88 (6.48, 7.30)       | 402.06 (378.81, 426.93) | 5.77 (5.43, 6.13)       | 313.81 (295.43, 333.38) | -16.09 | -1.07 (-1.17, -0.96) |
| Tokelau                      | 24.63 (23.12, 26.25)    | 314.92 (295.52, 335.61) | 30.75 (28.83, 32.66)    | 272.16 (255.16, 289.04) | 24.85  | -0.53 (-0.58, -0.47) |
| Tonga                        | 0.01 (0.01, 0.01)       | 196.44 (182.97, 210.65) | 0.00 (0.00, 0.00)       | 178.32 (166.67, 190.18) | -43.25 | -0.36 (-0.45, -0.27) |
| Trinidad and Tobago          | 0.23 (0.21, 0.24)       | 181.86 (168.82, 195.51) | 0.19 (0.18, 0.21)       | 172.91 (160.48, 185.47) | -14.63 | -0.23 (-0.28, -0.18) |
| Tunisia                      | 2.30 (2.14, 2.45)       | 204.24 (190.57, 217.93) | 1.57 (1.46, 1.68)       | 212.35 (197.96, 227.50) | -31.68 | 0.12 (0.11, 0.12)    |
| Turkey                       | 21.68 (20.14, 23.17)    | 190.81 (177.26, 203.95) | 13.79 (12.88, 14.66)    | 171.94 (160.69, 182.84) | -36.4  | -0.31 (-0.41, -0.22) |
| Turkmenistan                 | 225.00 (210.43, 240.54) | 285.21 (266.73, 304.91) | 130.23 (121.65, 139.28) | 277.14 (258.88, 296.40) | -42.12 | -0.18 (-0.23, -0.13) |
| Tuvalu                       | 6.76 (6.18, 7.35)       | 107.73 (98.46, 117.06)  | 5.81 (5.32, 6.29)       | 108.16 (99.06, 117.20)  | -14.15 | -0.06 (-0.11, -0.02) |
| Uganda                       | 0.03 (0.02, 0.03)       | 190.86 (177.56, 204.16) | 0.02 (0.02, 0.02)       | 178.79 (166.62, 190.41) | -29.16 | -0.20 (-0.25, -0.14) |
| Ukraine                      | 123.19 (115.08, 131.11) | 278.91 (260.56, 296.86) | 188.44 (176.03, 201.28) | 249.72 (233.28, 266.74) | 52.97  | -0.46 (-0.62, -0.30) |
| United Arab Emirates         | 32.81 (30.04, 35.56)    | 103.57 (94.81, 112.23)  | 20.73 (19.19, 22.16)    | 110.85 (102.62, 118.49) | -36.83 | 0.30 (0.25, 0.35)    |
| United Kingdom               | 4.29 (4.00, 4.60)       | 193.03 (180.16, 207.14) | 5.43 (5.08, 5.81)       | 200.86 (187.95, 214.99) | 26.52  | 0.19 (0.11, 0.27)    |
| Tanzania                     | 57.54 (57.02, 58.09)    | 150.09 (148.75, 151.52) | 53.28 (52.78, 53.76)    | 140.75 (139.44, 142.01) | -7.4   | -0.18 (-0.28, -0.08) |
| United States of America     | 443.65 (439.84, 447.46) | 221.44 (219.53, 223.34) | 442.43 (436.30, 448.41) | 241.03 (237.69, 244.29) | -0.28  | 0.28 (0.08, 0.47)    |
| United States Virgin Islands | 0.24 (0.22, 0.25)       | 219.23 (203.12, 234.88) | 0.14 (0.13, 0.14)       | 224.73 (209.34, 239.44) | -42.74 | 0.11 (0.08, 0.13)    |
| Uruguay                      | 4.97 (4.69, 5.24)       | 187.59 (176.99, 198.05) | 4.40 (4.14, 4.65)       | 200.21 (188.51, 211.78) | -11.49 | 0.26 (0.21, 0.31)    |
| Uzbekistan                   | 42.27 (38.96, 45.54)    | 123.63 (113.94, 133.20) | 40.93 (37.66, 44.42)    | 119.42 (109.86, 129.60) | -3.16  | -0.18 (-0.21, -0.15) |
| Vanuatu                      | 0.55 (0.51, 0.59)       | 201.94 (187.92, 215.97) | 0.70 (0.66, 0.75)       | 189.56 (177.38, 202.86) | 26.93  | -0.20 (-0.24, -0.16) |
| Venezuela                    | 52.26 (48.98, 55.79)    | 190.49 (178.53, 203.34) | 46.74 (43.63, 49.59)    | 205.72 (192.04, 218.27) | -10.57 | 0.35 (0.26, 0.44)    |
| Viet Nam                     | 161.11 (149.45, 173.31) | 183.95 (170.65, 197.88) | 89.17 (82.14, 96.53)    | 139.26 (128.28, 150.75) | -44.65 | -1.22 (-1.33, -1.11) |
| Yemen                        | 171.65 (163.47, 179.31) | 530.69 (505.41, 554.39) | 243.85 (232.09, 256.28) | 545.07 (518.79, 572.86) | 42.06  | 0.04 (-0.01, 0.09)   |
| Zambia                       | 48.26 (45.69, 51.23)    | 263.36 (249.34, 279.54) | 73.48 (68.48, 78.40)    | 250.25 (233.21, 267.00) | 52.25  | -0.11 (-0.22, 0.01)  |
| Zimbabwe                     | 46.77 (44.24, 49.70)    | 255.35 (241.52, 271.37) | 49.84 (46.95, 53.00)    | 234.51 (220.90, 249.38) | 6.57   | -0.36 (-0.67, -0.05) |

ASIR: age-standardized rate; CI: confidence interval; EAPC: estimated annual percentage change; GBD: Global Burden of Disease; UI: uncertainty interval.

**eTable 3. The deaths and ASMRs of neonatal preterm birth in 1990 and 2019 and their change trends from 1990 to 2019 at national level.**

| Nation                 | 1990                          |                                  | 2019                         |                                  | 1990-2019                                     |                              |
|------------------------|-------------------------------|----------------------------------|------------------------------|----------------------------------|-----------------------------------------------|------------------------------|
|                        | Death<br>No. (95% UI)         | ASMR per 100,000<br>No. (95% UI) | Death<br>No. (95% UI)        | ASMR per 100,000<br>No. (95% UI) | Percentage of relative change<br>in death (%) | EAPC of ASMR<br>No. (95% CI) |
| Afghanistan            | 6088.26 (3510.81, 9522.36)    | 24.77 (14.27, 38.80)             | 8516.31 (4490.35, 13906.54)  | 12.01 (6.33, 19.61)              | 39.88                                         | -2.40 (-2.60, -2.20)         |
| Albania                | 396.70 (327.32, 474.17)       | 9.63 (7.94, 11.52)               | 53.19 (33.18, 82.43)         | 3.16 (1.97, 4.90)                | -86.59                                        | -4.23 (-4.62, -3.84)         |
| Algeria                | 11900.09 (8942.52, 15676.22)  | 32.30 (24.28, 42.56)             | 5499.48 (4036.12, 7261.45)   | 13.09 (9.60, 17.28)              | -53.79                                        | -2.96 (-3.11, -2.81)         |
| American Samoa         | 5.48 (4.11, 6.86)             | 6.71 (5.03, 8.40)                | 2.04 (1.45, 2.78)            | 4.03 (2.85, 5.49)                | -62.77                                        | -1.79 (-1.94, -1.63)         |
| Andorra                | 0.67 (0.51, 0.87)             | 2.66 (2.01, 3.46)                | 0.19 (0.13, 0.26)            | 0.83 (0.57, 1.17)                | -71.95                                        | -3.38 (-3.88, -2.87)         |
| Angola                 | 5566.72 (3724.03, 7687.99)    | 23.01 (15.39, 31.76)             | 7084.75 (4992.68, 9446.67)   | 13.38 (9.43, 17.84)              | 27.27                                         | -1.79 (-1.91, -1.66)         |
| Antigua and Barbuda    | 6.07 (4.91, 7.44)             | 9.31 (7.53, 11.41)               | 2.45 (1.69, 3.34)            | 5.11 (3.53, 6.98)                | -59.71                                        | -2.81 (-3.21, -2.40)         |
| Argentina              | 5904.31 (5388.54, 6403.79)    | 17.76 (16.21, 19.27)             | 1895.09 (1456.98, 2409.66)   | 5.68 (4.37, 7.22)                | -67.9                                         | -3.75 (-3.90, -3.61)         |
| Armenia                | 751.03 (601.38, 915.69)       | 20.59 (16.49, 25.11)             | 75.32 (55.57, 99.42)         | 4.16 (3.07, 5.49)                | -89.97                                        | -6.07 (-6.47, -5.66)         |
| Australia              | 523.48 (479.57, 576.76)       | 4.23 (3.88, 4.66)                | 191.94 (154.35, 232.59)      | 1.29 (1.04, 1.57)                | -63.33                                        | -3.43 (-3.87, -2.99)         |
| Austria                | 172.89 (152.58, 196.14)       | 3.86 (3.41, 4.38)                | 54.63 (44.72, 65.69)         | 1.28 (1.05, 1.54)                | -68.4                                         | -4.18 (-4.76, -3.60)         |
| Azerbaijan             | 1430.36 (1028.08, 1867.39)    | 15.73 (11.31, 20.53)             | 850.84 (618.29, 1132.06)     | 12.35 (8.98, 16.42)              | -40.52                                        | -0.57 (-1.21, 0.07)          |
| Bahamas                | 22.83 (18.39, 28.10)          | 8.83 (7.12, 10.87)               | 6.99 (4.93, 9.46)            | 3.50 (2.47, 4.73)                | -69.37                                        | -2.45 (-2.82, -2.08)         |
| Bahrain                | 108.71 (90.72, 130.15)        | 16.55 (13.81, 19.82)             | 21.20 (16.49, 27.40)         | 3.34 (2.60, 4.32)                | -80.49                                        | -4.87 (-5.58, -4.15)         |
| Bangladesh             | 62567.93 (51067.99, 75024.24) | 33.36 (27.24, 40.00)             | 7536.37 (4248.88, 12071.75)  | 5.85 (3.30, 9.37)                | -87.95                                        | -6.34 (-6.57, -6.11)         |
| Barbados               | 18.81 (15.11, 23.26)          | 9.35 (7.51, 11.56)               | 7.36 (4.91, 10.64)           | 5.35 (3.57, 7.73)                | -60.88                                        | -1.90 (-2.04, -1.77)         |
| Belarus                | 297.65 (229.71, 371.91)       | 4.38 (3.38, 5.48)                | 41.32 (28.39, 57.33)         | 0.83 (0.57, 1.15)                | -86.12                                        | -6.22 (-6.67, -5.77)         |
| Belgium                | 240.26 (214.49, 276.41)       | 3.98 (3.55, 4.58)                | 58.47 (44.92, 73.75)         | 0.99 (0.76, 1.24)                | -75.67                                        | -4.52 (-5.19, -3.84)         |
| Belize                 | 49.07 (41.17, 58.39)          | 17.38 (14.58, 20.68)             | 25.15 (19.33, 31.56)         | 6.84 (5.25, 8.58)                | -48.75                                        | -3.32 (-3.54, -3.09)         |
| Benin                  | 2923.37 (1955.38, 4023.52)    | 25.72 (17.21, 35.41)             | 4711.74 (3139.94, 6444.34)   | 19.57 (13.05, 26.76)             | 61.18                                         | -0.73 (-0.80, -0.66)         |
| Bermuda                | 1.49 (1.18, 1.88)             | 3.50 (2.76, 4.41)                | 0.24 (0.16, 0.35)            | 0.98 (0.65, 1.42)                | -83.94                                        | -3.62 (-4.45, -2.78)         |
| Bhutan                 | 382.69 (275.87, 505.72)       | 36.39 (26.22, 48.13)             | 83.65 (55.18, 120.41)        | 13.01 (8.58, 18.73)              | -78.14                                        | -3.47 (-3.58, -3.36)         |
| Bolivia                | 3318.09 (2637.93, 4088.12)    | 28.65 (22.78, 35.33)             | 1615.43 (1129.94, 2172.11)   | 10.45 (7.30, 14.05)              | -51.31                                        | -3.35 (-3.50, -3.20)         |
| Bosnia and Herzegovina | 497.21 (400.10, 631.52)       | 15.20 (12.23, 19.31)             | 46.55 (36.32, 57.98)         | 3.59 (2.80, 4.47)                | -90.64                                        | -5.44 (-6.01, -4.87)         |
| Botswana               | 254.64 (171.76, 352.61)       | 13.02 (8.78, 18.03)              | 292.25 (190.97, 436.06)      | 12.65 (8.26, 18.88)              | 14.77                                         | 0.01 (-0.26, 0.29)           |
| Brazil                 | 46221.39 (40124.64, 53515.69) | 28.04 (24.35, 32.47)             | 11041.82 (8789.55, 13621.88) | 7.41 (5.90, 9.15)                | -76.11                                        | -4.49 (-4.60, -4.39)         |
| Brunei                 | 12.98 (10.28, 15.80)          | 3.84 (3.04, 4.67)                | 10.98 (8.00, 14.84)          | 3.58 (2.60, 4.84)                | -15.39                                        | 0.30 (0.02, 0.57)            |



|                                  |                                  |                      |                               |                      |        |                        |
|----------------------------------|----------------------------------|----------------------|-------------------------------|----------------------|--------|------------------------|
| Bulgaria                         | 221.39 (188.10, 268.79)          | 4.66 (3.96, 5.66)    | 86.49 (63.84, 111.98)         | 2.98 (2.20, 3.86)    | -60.93 | -1.33 (-1.75, -0.92)   |
| Burkina Faso                     | 3482.66 (2348.95, 4843.08)       | 15.89 (10.72, 22.08) | 6142.75 (4087.34, 8727.30)    | 13.69 (9.11, 19.45)  | 76.38  | -0.09 (-0.34, 0.16)    |
| Burundi                          | 2515.94 (1822.55, 3253.95)       | 19.98 (14.49, 25.83) | 2244.85 (1479.51, 3178.43)    | 10.08 (6.65, 14.27)  | -10.78 | -2.38 (-2.49, -2.26)   |
| Cambodia                         | 5025.96 (3859.72, 6383.31)       | 24.07 (18.48, 30.61) | 2244.18 (1563.16, 3128.54)    | 12.78 (8.90, 17.81)  | -55.35 | -2.04 (-2.22, -1.86)   |
| Cameroon                         | 4161.78 (2895.02, 5641.17)       | 18.72 (13.03, 25.37) | 5822.80 (4010.12, 7891.80)    | 13.48 (9.29, 18.28)  | 39.91  | -1.08 (-1.17, -0.99)   |
| Canada                           | 761.05 (693.65, 852.68)          | 3.89 (3.55, 4.36)    | 438.75 (373.50, 511.25)       | 2.42 (2.06, 2.82)    | -42.35 | -1.05 (-1.27, -0.83)   |
| Cape Verde                       | 82.07 (63.88, 99.65)             | 14.55 (11.33, 17.66) | 39.47 (26.21, 56.96)          | 7.66 (5.09, 11.06)   | -51.91 | -1.90 (-2.59, -1.22)   |
| Central African Republic         | 1591.87 (1130.76, 2160.65)       | 26.47 (18.83, 35.88) | 2209.69 (1498.77, 3096.23)    | 23.51 (15.95, 32.92) | 38.81  | -0.07 (-0.23, 0.08)    |
| Chad                             | 3260.91 (2247.94, 4578.49)       | 21.56 (14.86, 30.33) | 6139.86 (3802.10, 8628.95)    | 16.30 (10.10, 22.90) | 88.29  | -0.81 (-0.94, -0.67)   |
| Chile                            | 1143.92 (1046.24, 1239.26)       | 7.99 (7.31, 8.66)    | 346.32 (249.54, 466.61)       | 3.17 (2.29, 4.28)    | -69.73 | -2.44 (-2.74, -2.14)   |
| China                            | 157281.24 (137749.62, 178187.94) | 13.63 (11.94, 15.44) | 22133.87 (18920.51, 25726.19) | 3.07 (2.62, 3.56)    | -85.93 | -5.36 (-5.64, -5.09)   |
| Colombia                         | 6801.25 (5870.45, 7789.80)       | 15.21 (13.13, 17.42) | 1756.21 (1129.70, 2573.84)    | 4.61 (2.96, 6.76)    | -74.18 | -4.23 (-4.56, -3.90)   |
| Comoros                          | 231.90 (155.57, 325.27)          | 24.66 (16.55, 34.61) | 105.88 (60.19, 169.02)        | 13.39 (7.61, 21.37)  | -54.34 | -2.04 (-2.22, -1.85)   |
| Congo                            | 727.62 (499.46, 987.23)          | 15.24 (10.47, 20.67) | 784.60 (549.42, 1045.33)      | 11.39 (7.98, 15.18)  | 7.83   | -0.75 (-0.98, -0.53)   |
| Cook Islands                     | 1.79 (1.30, 2.42)                | 7.74 (5.62, 10.47)   | 0.05 (0.02, 0.08)             | 0.39 (0.18, 0.64)    | -97.15 | -10.23 (-11.01, -9.45) |
| Costa Rica                       | 345.62 (289.36, 404.08)          | 8.87 (7.42, 10.36)   | 136.19 (92.91, 188.53)        | 4.26 (2.91, 5.89)    | -60.6  | -2.31 (-2.50, -2.12)   |
| Cote d'Ivoire                    | 6150.44 (4345.58, 8021.56)       | 22.61 (15.97, 29.48) | 8456.74 (5675.22, 11626.88)   | 20.03 (13.44, 27.53) | 37.5   | -0.27 (-0.56, 0.02)    |
| Croatia                          | 148.42 (133.97, 162.69)          | 5.52 (4.99, 6.06)    | 15.84 (11.05, 21.71)          | 0.92 (0.64, 1.26)    | -89.33 | -6.72 (-7.18, -6.26)   |
| Cuba                             | 355.19 (297.13, 423.33)          | 4.07 (3.40, 4.85)    | 50.70 (34.08, 67.37)          | 1.00 (0.67, 1.33)    | -85.73 | -4.53 (-5.11, -3.95)   |
| Cyprus                           | 52.01 (42.64, 67.55)             | 7.84 (6.43, 10.19)   | 9.72 (6.99, 13.22)            | 1.32 (0.95, 1.80)    | -81.31 | -6.22 (-6.69, -5.75)   |
| Czech Republic                   | 458.98 (420.63, 510.91)          | 7.44 (6.81, 8.28)    | 47.91 (34.44, 63.93)          | 0.90 (0.65, 1.20)    | -89.56 | -7.40 (-8.72, -6.06)   |
| Democratic Republic of the Congo | 17331.13 (11985.85, 23508.59)    | 19.43 (13.45, 26.31) | 17225.81 (11234.23, 24199.28) | 12.33 (8.04, 17.32)  | -0.61  | -1.22 (-1.42, -1.03)   |
| Denmark                          | 119.07 (104.37, 134.73)          | 3.89 (3.41, 4.40)    | 76.13 (56.63, 97.21)          | 2.49 (1.86, 3.19)    | -36.06 | -0.55 (-0.91, -0.18)   |
| Djibouti                         | 168.57 (118.63, 229.73)          | 15.99 (11.25, 21.75) | 168.08 (106.16, 250.48)       | 10.16 (6.41, 15.13)  | -0.29  | -1.65 (-1.80, -1.49)   |
| Dominica                         | 6.28 (4.49, 8.20)                | 7.65 (5.47, 10.00)   | 3.47 (2.23, 5.06)             | 8.68 (5.58, 12.66)   | -44.73 | 0.29 (0.07, 0.50)      |
| Dominican Republic               | 2555.90 (2054.81, 3123.25)       | 22.36 (17.97, 27.32) | 1549.01 (1025.90, 2173.15)    | 14.16 (9.37, 19.86)  | -39.39 | -1.19 (-1.38, -0.99)   |
| Ecuador                          | 1961.48 (1610.06, 2360.75)       | 13.66 (11.22, 16.45) | 1124.40 (761.75, 1588.09)     | 6.69 (4.53, 9.45)    | -42.68 | -2.67 (-3.25, -2.09)   |
| Egypt                            | 11153.49 (5988.53, 17659.73)     | 12.34 (6.63, 19.55)  | 1589.61 (646.56, 2982.17)     | 1.56 (0.63, 2.93)    | -85.75 | -7.40 (-8.26, -6.52)   |
| El Salvador                      | 1615.79 (1273.39, 2023.52)       | 20.59 (16.24, 25.78) | 269.00 (180.89, 381.55)       | 4.96 (3.34, 7.03)    | -83.35 | -3.99 (-4.35, -3.63)   |
| Equatorial Guinea                | 198.66 (116.64, 293.06)          | 18.20 (10.72, 26.86) | 188.72 (113.82, 286.76)       | 10.19 (6.15, 15.48)  | -5     | -1.98 (-2.26, -1.69)   |

|                                |                                  |                      |                                  |                      |        |                      |
|--------------------------------|----------------------------------|----------------------|----------------------------------|----------------------|--------|----------------------|
| Eritrea                        | 855.39 (593.89, 1177.75)         | 14.43 (10.02, 19.87) | 777.24 (454.28, 1227.18)         | 8.16 (4.77, 12.88)   | -9.14  | -1.45 (-1.58, -1.32) |
| Estonia                        | 29.12 (22.96, 35.77)             | 2.81 (2.21, 3.45)    | 3.32 (2.19, 4.37)                | 0.51 (0.34, 0.68)    | -88.6  | -5.78 (-6.41, -5.13) |
| Eswatini                       | 193.59 (136.84, 263.89)          | 12.70 (8.99, 17.32)  | 147.11 (102.73, 201.17)          | 10.46 (7.30, 14.30)  | -24.01 | -0.43 (-0.61, -0.25) |
| Ethiopia                       | 26028.25 (20416.08, 32435.95)    | 22.14 (17.37, 27.58) | 16002.76 (11438.12, 21614.24)    | 9.15 (6.54, 12.36)   | -38.52 | -3.18 (-3.37, -3.00) |
| Federated States of Micronesia | 22.98 (17.20, 29.54)             | 13.78 (10.31, 17.72) | 4.50 (3.09, 6.18)                | 4.80 (3.30, 6.60)    | -80.41 | -3.78 (-3.92, -3.65) |
| Fiji                           | 90.47 (71.83, 112.40)            | 9.91 (7.87, 12.31)   | 78.03 (54.99, 107.89)            | 9.26 (6.52, 12.79)   | -13.75 | -0.04 (-0.19, 0.11)  |
| Finland                        | 92.36 (79.16, 106.45)            | 2.90 (2.49, 3.35)    | 15.63 (10.75, 19.89)             | 0.64 (0.44, 0.82)    | -83.07 | -5.03 (-5.33, -4.73) |
| France                         | 969.32 (850.40, 1103.56)         | 2.62 (2.30, 2.99)    | 318.89 (247.30, 399.44)          | 0.92 (0.72, 1.16)    | -67.1  | -3.21 (-3.73, -2.69) |
| Gabon                          | 326.55 (230.50, 429.59)          | 17.39 (12.28, 22.87) | 205.82 (130.58, 308.72)          | 10.08 (6.40, 15.13)  | -36.97 | -1.56 (-1.88, -1.23) |
| Gambia                         | 408.49 (223.02, 633.99)          | 17.78 (9.71, 27.60)  | 346.99 (192.17, 572.69)          | 10.19 (5.65, 16.82)  | -15.06 | -1.66 (-1.88, -1.43) |
| Georgia                        | 511.43 (394.33, 683.56)          | 12.72 (9.80, 17.01)  | 65.64 (46.30, 88.24)             | 2.97 (2.10, 4.00)    | -87.17 | -5.63 (-6.26, -4.99) |
| Germany                        | 1894.35 (1659.65, 2152.65)       | 4.39 (3.84, 4.99)    | 630.92 (541.57, 716.73)          | 1.71 (1.47, 1.94)    | -66.69 | -2.72 (-2.94, -2.51) |
| Ghana                          | 3024.32 (1697.98, 4893.47)       | 10.49 (5.89, 16.97)  | 2712.66 (1510.13, 4358.71)       | 6.65 (3.70, 10.68)   | -10.31 | -2.27 (-2.98, -1.55) |
| Greece                         | 375.96 (326.89, 459.79)          | 7.51 (6.53, 9.18)    | 96.65 (75.61, 119.94)            | 2.32 (1.82, 2.88)    | -74.29 | -4.20 (-4.79, -3.61) |
| Greenland                      | 15.31 (13.05, 17.97)             | 26.54 (22.62, 31.14) | 2.65 (1.67, 3.98)                | 6.86 (4.34, 10.31)   | -82.71 | -4.71 (-4.95, -4.46) |
| Grenada                        | 11.01 (8.40, 14.03)              | 11.54 (8.81, 14.71)  | 4.30 (2.97, 6.22)                | 6.44 (4.45, 9.32)    | -60.93 | -1.85 (-2.23, -1.47) |
| Guam                           | 8.97 (6.88, 11.27)               | 4.97 (3.81, 6.24)    | 11.54 (8.68, 14.95)              | 7.36 (5.54, 9.54)    | 28.63  | 1.93 (1.45, 2.41)    |
| Guatemala                      | 5413.89 (4694.01, 6245.18)       | 33.60 (29.13, 38.78) | 1161.48 (802.05, 1601.31)        | 5.86 (4.05, 8.09)    | -78.55 | -6.78 (-7.29, -6.28) |
| Guinea                         | 4160.58 (3001.25, 5545.34)       | 27.73 (20.01, 37.00) | 3632.23 (2433.21, 5004.13)       | 15.88 (10.66, 21.87) | -12.7  | -2.19 (-2.31, -2.07) |
| Guinea-Bissau                  | 657.21 (470.25, 877.96)          | 29.63 (21.23, 39.51) | 555.25 (387.26, 746.87)          | 18.63 (12.99, 25.05) | -15.51 | -1.42 (-1.59, -1.24) |
| Guyana                         | 330.00 (271.90, 398.10)          | 31.05 (25.58, 37.47) | 86.60 (58.51, 124.00)            | 12.61 (8.52, 18.06)  | -73.76 | -2.85 (-3.05, -2.66) |
| Haiti                          | 1232.55 (714.54, 1925.39)        | 10.48 (6.08, 16.37)  | 1556.92 (861.50, 2387.89)        | 9.85 (5.45, 15.10)   | 26.32  | 0.02 (-0.08, 0.11)   |
| Honduras                       | 1523.35 (1184.00, 1843.52)       | 17.73 (13.78, 21.47) | 799.78 (559.94, 1073.65)         | 7.09 (4.96, 9.52)    | -47.5  | -3.02 (-3.34, -2.71) |
| Hungary                        | 574.70 (505.07, 630.21)          | 9.64 (8.47, 10.57)   | 64.36 (42.83, 88.71)             | 1.61 (1.07, 2.22)    | -88.8  | -6.17 (-6.44, -5.89) |
| Iceland                        | 9.37 (8.10, 10.94)               | 4.20 (3.63, 4.90)    | 2.39 (1.44, 3.86)                | 1.16 (0.70, 1.88)    | -74.48 | -4.65 (-5.10, -4.19) |
| India                          | 317674.34 (273312.82, 371644.24) | 25.32 (21.78, 29.63) | 165604.31 (132584.48, 204832.30) | 14.71 (11.78, 18.19) | -47.87 | -1.44 (-1.64, -1.24) |
| Indonesia                      | 49805.25 (41417.36, 58517.78)    | 21.84 (18.16, 25.66) | 17792.35 (13709.27, 22707.78)    | 9.65 (7.44, 12.32)   | -64.28 | -2.81 (-2.94, -2.68) |
| Iran                           | 32989.75 (27058.25, 40162.45)    | 38.54 (31.61, 46.92) | 4459.08 (3545.97, 5496.22)       | 6.86 (5.46, 8.46)    | -86.48 | -5.14 (-5.73, -4.54) |
| Iraq                           | 11661.24 (9871.94, 13666.95)     | 34.76 (29.44, 40.73) | 4553.32 (3194.62, 6401.92)       | 9.89 (6.94, 13.91)   | -60.95 | -3.92 (-4.36, -3.47) |
| Ireland                        | 108.37 (97.32, 123.02)           | 4.19 (3.76, 4.75)    | 40.48 (30.17, 52.87)             | 1.39 (1.03, 1.81)    | -62.65 | -3.93 (-4.28, -3.58) |

|                  |                               |                      |                              |                      |        |                      |
|------------------|-------------------------------|----------------------|------------------------------|----------------------|--------|----------------------|
| Israel           | 357.56 (320.69, 412.38)       | 7.14 (6.40, 8.23)    | 96.29 (70.96, 125.64)        | 1.03 (0.76, 1.34)    | -73.07 | -6.60 (-6.76, -6.43) |
| Italy            | 1573.46 (1454.92, 1714.05)    | 5.85 (5.40, 6.37)    | 254.89 (206.75, 301.45)      | 1.19 (0.96, 1.40)    | -83.8  | -5.63 (-5.93, -5.33) |
| Jamaica          | 508.26 (421.90, 604.74)       | 18.87 (15.66, 22.45) | 230.32 (160.46, 324.67)      | 13.28 (9.26, 18.73)  | -54.68 | -1.51 (-1.70, -1.32) |
| Japan            | 1061.37 (989.49, 1149.47)     | 1.78 (1.66, 1.93)    | 181.10 (146.29, 210.60)      | 0.41 (0.33, 0.48)    | -82.94 | -4.81 (-5.08, -4.53) |
| Jordan           | 1312.01 (1072.19, 1590.99)    | 20.05 (16.39, 24.32) | 1009.63 (727.08, 1425.54)    | 8.54 (6.15, 12.06)   | -23.05 | -3.12 (-3.34, -2.90) |
| Kazakhstan       | 1801.80 (1495.06, 2157.28)    | 10.54 (8.74, 12.61)  | 789.00 (561.05, 1039.17)     | 4.63 (3.29, 6.10)    | -56.21 | -2.94 (-3.81, -2.07) |
| Kenya            | 4831.96 (3676.21, 6045.46)    | 10.11 (7.69, 12.64)  | 4362.44 (3422.40, 5538.71)   | 6.78 (5.32, 8.61)    | -9.72  | -1.29 (-1.44, -1.14) |
| Kiribati         | 33.80 (25.26, 44.07)          | 27.55 (20.58, 35.92) | 22.46 (15.35, 31.69)         | 15.49 (10.59, 21.86) | -33.54 | -1.89 (-1.94, -1.85) |
| Kuwait           | 188.20 (159.50, 227.29)       | 10.17 (8.62, 12.28)  | 172.53 (131.80, 223.32)      | 5.84 (4.47, 7.57)    | -8.32  | -0.08 (-0.66, 0.51)  |
| Kyrgyzstan       | 950.54 (730.57, 1216.28)      | 15.72 (12.08, 20.11) | 595.63 (498.78, 702.11)      | 8.53 (7.14, 10.05)   | -37.34 | -0.93 (-1.70, -0.15) |
| Lao              | 3613.46 (2852.03, 4486.35)    | 45.87 (36.07, 57.00) | 1518.31 (1123.96, 1958.18)   | 18.51 (13.70, 23.86) | -57.98 | -3.18 (-3.39, -2.98) |
| Latvia           | 35.71 (28.66, 43.70)          | 2.02 (1.62, 2.48)    | 3.96 (2.58, 5.32)            | 0.43 (0.28, 0.57)    | -88.91 | -6.21 (-6.73, -5.69) |
| Lebanon          | 1123.74 (897.85, 1365.59)     | 21.36 (17.06, 25.96) | 240.24 (135.18, 366.77)      | 4.73 (2.66, 7.22)    | -78.62 | -5.08 (-5.18, -4.97) |
| Lesotho          | 676.61 (449.59, 927.15)       | 23.39 (15.56, 32.05) | 404.25 (258.72, 583.25)      | 18.25 (11.68, 26.33) | -40.25 | -0.82 (-0.99, -0.66) |
| Liberia          | 1184.65 (859.80, 1507.53)     | 30.95 (22.47, 39.36) | 779.09 (501.48, 1149.64)     | 12.12 (7.80, 17.88)  | -34.23 | -2.94 (-3.15, -2.73) |
| Libya            | 1823.40 (1422.07, 2330.16)    | 25.37 (19.79, 32.42) | 174.98 (123.79, 240.57)      | 4.44 (3.15, 6.11)    | -90.4  | -6.24 (-6.43, -6.05) |
| Lithuania        | 119.31 (101.12, 138.26)       | 4.42 (3.74, 5.12)    | 9.74 (6.65, 12.48)           | 0.75 (0.51, 0.96)    | -91.84 | -6.96 (-7.46, -6.45) |
| Luxembourg       | 6.94 (5.86, 8.31)             | 2.90 (2.45, 3.47)    | 1.63 (0.95, 2.65)            | 0.51 (0.30, 0.83)    | -76.49 | -5.94 (-6.49, -5.37) |
| Macedonia        | 362.09 (325.16, 401.76)       | 21.48 (19.28, 23.83) | 82.04 (66.44, 99.63)         | 7.66 (6.20, 9.30)    | -77.34 | -2.55 (-3.09, -2.02) |
| Madagascar       | 5119.27 (3903.78, 6532.83)    | 20.19 (15.38, 25.77) | 5122.04 (3455.82, 7217.55)   | 12.51 (8.44, 17.62)  | 0.05   | -1.36 (-1.45, -1.28) |
| Malawi           | 4123.30 (3029.60, 5492.25)    | 18.64 (13.69, 24.79) | 2587.81 (1617.68, 3756.47)   | 9.86 (6.17, 14.31)   | -37.24 | -2.18 (-2.27, -2.09) |
| Malaysia         | 1592.42 (1234.81, 2082.69)    | 6.67 (5.17, 8.72)    | 524.53 (386.42, 685.25)      | 2.01 (1.48, 2.62)    | -67.06 | -3.59 (-4.37, -2.81) |
| Maldives         | 111.64 (84.85, 144.87)        | 26.52 (20.16, 34.42) | 25.98 (17.48, 37.04)         | 6.40 (4.30, 9.13)    | -76.73 | -4.87 (-5.03, -4.71) |
| Mali             | 7175.10 (5148.97, 9814.01)    | 34.03 (24.42, 46.59) | 10624.37 (7253.94, 14729.59) | 23.10 (15.79, 32.04) | 48.07  | -1.22 (-1.46, -0.99) |
| Malta            | 21.75 (19.16, 25.37)          | 8.04 (7.08, 9.38)    | 7.41 (4.82, 10.97)           | 3.57 (2.33, 5.29)    | -65.93 | -2.72 (-3.12, -2.32) |
| Marshall Islands | 10.02 (7.87, 12.34)           | 13.74 (10.78, 16.93) | 5.09 (3.68, 6.94)            | 8.59 (6.20, 11.69)   | -49.16 | -1.72 (-2.18, -1.26) |
| Mauritania       | 965.53 (697.57, 1267.57)      | 22.66 (16.38, 29.72) | 672.19 (462.39, 920.85)      | 12.82 (8.82, 17.56)  | -30.38 | -1.69 (-1.81, -1.57) |
| Mauritius        | 195.80 (181.57, 211.56)       | 18.14 (16.82, 19.60) | 43.53 (31.32, 58.33)         | 7.04 (5.06, 9.43)    | -77.77 | -3.77 (-4.19, -3.35) |
| Mexico           | 18374.91 (14612.81, 22586.17) | 15.43 (12.27, 18.97) | 5374.61 (4050.80, 6787.75)   | 5.33 (4.01, 6.73)    | -70.75 | -3.55 (-3.74, -3.36) |
| Moldova          | 142.25 (101.91, 192.26)       | 3.82 (2.73, 5.17)    | 33.60 (24.29, 45.42)         | 2.17 (1.57, 2.93)    | -76.38 | -1.44 (-2.20, -0.68) |

|                          |                               |                      |                               |                      |        |                      |
|--------------------------|-------------------------------|----------------------|-------------------------------|----------------------|--------|----------------------|
| Monaco                   | 0.23 (0.15, 0.34)             | 1.78 (1.16, 2.61)    | 0.08 (0.05, 0.11)             | 0.49 (0.33, 0.69)    | -67.96 | -4.33 (-4.42, -4.24) |
| Mongolia                 | 500.05 (369.19, 659.51)       | 14.31 (10.57, 18.87) | 200.26 (136.87, 271.40)       | 5.20 (3.55, 7.04)    | -59.95 | -3.44 (-3.99, -2.89) |
| Montenegro               | 44.34 (37.35, 52.26)          | 9.21 (7.75, 10.86)   | 4.65 (2.84, 6.09)             | 1.44 (0.88, 1.88)    | -89.52 | -6.69 (-7.43, -5.94) |
| Morocco                  | 11999.24 (9342.52, 15098.30)  | 31.72 (24.69, 39.91) | 2858.64 (1975.78, 3979.92)    | 9.90 (6.84, 13.77)   | -76.18 | -3.74 (-4.07, -3.41) |
| Mozambique               | 5528.48 (3754.66, 7578.16)    | 19.88 (13.53, 27.25) | 6223.58 (4119.17, 8736.99)    | 11.59 (7.67, 16.26)  | 12.57  | -1.81 (-1.95, -1.66) |
| Myanmar                  | 18267.32 (12487.77, 25583.55) | 28.86 (19.75, 40.44) | 7368.27 (4909.43, 10218.97)   | 14.73 (9.82, 20.43)  | -59.66 | -2.39 (-2.62, -2.16) |
| Namibia                  | 322.83 (223.68, 428.05)       | 13.93 (9.65, 18.47)  | 279.01 (185.29, 414.94)       | 9.31 (6.18, 13.85)   | -13.57 | -0.96 (-1.12, -0.80) |
| Nauru                    | 2.33 (1.72, 3.04)             | 11.70 (8.64, 15.23)  | 1.44 (1.07, 1.90)             | 10.11 (7.48, 13.31)  | -38.23 | 0.02 (-0.68, 0.72)   |
| Nepal                    | 3873.49 (2390.82, 5965.69)    | 9.96 (6.16, 15.33)   | 798.37 (463.47, 1266.91)      | 2.71 (1.57, 4.30)    | -79.39 | -4.96 (-5.35, -4.57) |
| Netherlands              | 344.93 (307.51, 383.65)       | 3.62 (3.22, 4.02)    | 125.20 (95.31, 159.88)        | 1.45 (1.10, 1.85)    | -63.7  | -3.17 (-3.49, -2.85) |
| New Zealand              | 128.74 (118.32, 140.85)       | 4.47 (4.10, 4.89)    | 59.98 (45.88, 75.86)          | 2.09 (1.60, 2.65)    | -53.41 | -1.60 (-2.09, -1.10) |
| Nicaragua                | 1274.62 (1075.79, 1489.02)    | 18.51 (15.63, 21.63) | 272.98 (202.89, 353.02)       | 4.33 (3.22, 5.60)    | -78.58 | -4.75 (-4.84, -4.65) |
| Niger                    | 3790.22 (2674.97, 5018.45)    | 17.93 (12.68, 23.71) | 7789.72 (5566.01, 10358.18)   | 14.20 (10.16, 18.88) | 105.52 | -1.21 (-1.43, -1.00) |
| Nigeria                  | 42886.39 (32659.01, 52574.34) | 21.75 (16.56, 26.68) | 76403.66 (58066.76, 98959.59) | 21.20 (16.11, 27.45) | 78.15  | 0.12 (0.02, 0.22)    |
| Niue                     | 0.25 (0.18, 0.32)             | 9.46 (6.83, 12.42)   | 0.09 (0.06, 0.12)             | 7.14 (5.07, 9.45)    | -64.59 | -1.16 (-1.46, -0.87) |
| North Korea              | 7890.47 (5771.41, 10467.07)   | 22.98 (16.81, 30.48) | 992.16 (722.66, 1351.24)      | 6.01 (4.38, 8.18)    | -87.43 | -4.27 (-4.63, -3.90) |
| Northern Mariana Islands | 3.02 (2.13, 4.09)             | 4.96 (3.51, 6.72)    | 1.11 (0.83, 1.42)             | 4.71 (3.53, 6.01)    | -63.27 | 0.80 (0.03, 1.59)    |
| Norway                   | 60.48 (51.78, 67.63)          | 2.08 (1.78, 2.33)    | 14.30 (10.32, 17.76)          | 0.51 (0.37, 0.64)    | -76.35 | -4.02 (-4.36, -3.68) |
| Oman                     | 612.26 (450.16, 816.43)       | 19.29 (14.19, 25.72) | 188.58 (146.45, 238.24)       | 5.01 (3.89, 6.34)    | -69.2  | -4.15 (-5.27, -3.01) |
| Pakistan                 | 54102.51 (41066.99, 68850.02) | 23.56 (17.87, 29.98) | 59399.79 (42951.20, 77884.25) | 18.69 (13.52, 24.51) | 9.79   | -0.61 (-0.70, -0.51) |
| Palau                    | 2.27 (1.70, 2.92)             | 12.84 (9.61, 16.53)  | 0.47 (0.32, 0.65)             | 5.15 (3.53, 7.16)    | -79.47 | -2.68 (-2.87, -2.49) |
| Palestine                | 1257.89 (1048.78, 1503.59)    | 27.73 (23.11, 33.13) | 469.87 (353.32, 629.13)       | 7.80 (5.87, 10.45)   | -62.65 | -3.80 (-4.30, -3.30) |
| Panama                   | 278.37 (229.71, 334.87)       | 9.80 (8.09, 11.79)   | 165.35 (114.56, 227.76)       | 4.49 (3.11, 6.19)    | -40.6  | -2.87 (-3.17, -2.57) |
| Papua New Guinea         | 1057.72 (717.71, 1451.25)     | 14.89 (10.11, 20.45) | 2014.44 (1304.74, 2988.97)    | 12.88 (8.34, 19.10)  | 90.45  | -0.35 (-0.45, -0.26) |
| Paraguay                 | 796.76 (660.05, 951.22)       | 12.98 (10.75, 15.50) | 267.83 (176.90, 379.17)       | 4.40 (2.90, 6.23)    | -66.38 | -3.61 (-4.13, -3.08) |
| Peru                     | 5648.51 (4449.40, 7134.38)    | 17.82 (14.04, 22.52) | 1339.88 (845.53, 1969.04)     | 4.36 (2.75, 6.42)    | -76.28 | -4.53 (-4.71, -4.35) |
| Philippines              | 13196.55 (11081.57, 15491.22) | 13.32 (11.19, 15.64) | 9915.74 (7325.45, 12930.46)   | 7.80 (5.76, 10.17)   | -24.86 | -1.53 (-1.67, -1.38) |
| Poland                   | 2929.27 (2621.14, 3232.18)    | 11.32 (10.13, 12.50) | 385.97 (271.39, 525.14)       | 2.20 (1.55, 2.99)    | -86.82 | -5.34 (-5.90, -4.77) |
| Portugal                 | 400.63 (347.83, 472.47)       | 7.23 (6.28, 8.53)    | 32.42 (22.74, 43.09)          | 0.84 (0.59, 1.12)    | -91.91 | -7.17 (-7.60, -6.74) |
| Puerto Rico              | 400.88 (364.08, 438.22)       | 12.69 (11.53, 13.88) | 51.58 (37.10, 70.28)          | 4.23 (3.05, 5.77)    | -87.13 | -3.92 (-4.30, -3.55) |

|                                  |                               |                      |                               |                      |        |                      |
|----------------------------------|-------------------------------|----------------------|-------------------------------|----------------------|--------|----------------------|
| Qatar                            | 100.27 (77.92, 126.45)        | 19.84 (15.42, 25.01) | 65.64 (49.56, 86.97)          | 4.98 (3.76, 6.60)    | -34.54 | -5.06 (-5.22, -4.90) |
| Romania                          | 608.74 (491.14, 743.37)       | 4.24 (3.42, 5.19)    | 222.60 (168.60, 284.78)       | 2.65 (2.01, 3.40)    | -63.43 | -1.45 (-1.76, -1.14) |
| Russia                           | 5856.75 (5489.59, 6545.39)    | 6.27 (5.88, 7.01)    | 1064.68 (827.06, 1336.72)     | 1.32 (1.02, 1.66)    | -81.82 | -5.67 (-6.13, -5.21) |
| Rwanda                           | 3082.43 (2218.64, 4145.06)    | 20.33 (14.63, 27.33) | 1444.57 (948.52, 2019.00)     | 8.56 (5.62, 11.96)   | -53.14 | -2.85 (-3.19, -2.52) |
| Saint Kitts and Nevis            | 7.03 (5.92, 8.42)             | 16.20 (13.64, 19.41) | 2.29 (1.72, 2.95)             | 6.83 (5.12, 8.79)    | -67.36 | -2.90 (-3.30, -2.51) |
| Saint Lucia                      | 26.36 (21.27, 32.22)          | 14.51 (11.71, 17.74) | 8.06 (5.43, 11.47)            | 9.42 (6.35, 13.41)   | -69.41 | -1.21 (-1.37, -1.05) |
| Saint Vincent and the Grenadines | 23.87 (18.36, 30.08)          | 18.73 (14.41, 23.61) | 5.98 (4.05, 8.40)             | 8.21 (5.57, 11.54)   | -74.94 | -2.72 (-2.93, -2.52) |
| Samoa                            | 21.79 (15.17, 30.69)          | 13.16 (9.15, 18.52)  | 7.77 (4.86, 11.30)            | 4.21 (2.63, 6.13)    | -64.36 | -3.64 (-3.79, -3.50) |
| San Marino                       | 0.31 (0.20, 0.46)             | 2.36 (1.53, 3.43)    | 0.13 (0.08, 0.19)             | 0.86 (0.54, 1.25)    | -57.94 | -3.59 (-3.84, -3.34) |
| Sao Tome and Principe            | 19.15 (12.74, 25.94)          | 8.62 (5.74, 11.66)   | 12.53 (7.17, 18.90)           | 5.57 (3.19, 8.41)    | -34.61 | -1.21 (-1.44, -0.97) |
| Saudi Arabia                     | 6366.05 (4650.68, 8330.31)    | 24.80 (18.12, 32.45) | 518.14 (361.72, 708.99)       | 2.36 (1.64, 3.22)    | -91.86 | -7.87 (-8.30, -7.43) |
| Senegal                          | 3062.33 (2221.18, 4015.88)    | 18.74 (13.59, 24.58) | 3157.93 (2094.69, 4337.09)    | 14.23 (9.44, 19.54)  | 3.12   | -0.91 (-1.04, -0.77) |
| Serbia                           | 1143.55 (1003.56, 1311.92)    | 17.87 (15.68, 20.50) | 104.93 (79.24, 133.23)        | 2.63 (1.99, 3.34)    | -90.82 | -6.34 (-6.96, -5.71) |
| Seychelles                       | 8.72 (6.72, 10.83)            | 10.77 (8.30, 13.38)  | 3.42 (2.36, 4.73)             | 4.80 (3.31, 6.63)    | -60.76 | -1.97 (-2.29, -1.64) |
| Sierra Leone                     | 2503.88 (1755.91, 3461.90)    | 33.45 (23.47, 46.25) | 2325.11 (1603.28, 3259.91)    | 17.48 (12.05, 24.51) | -7.14  | -2.31 (-2.39, -2.23) |
| Singapore                        | 81.46 (71.71, 97.56)          | 3.32 (2.93, 3.98)    | 13.58 (8.86, 19.88)           | 0.49 (0.32, 0.72)    | -83.33 | -5.80 (-6.24, -5.36) |
| Slovakia                         | 355.01 (314.78, 398.25)       | 9.36 (8.29, 10.50)   | 82.87 (61.57, 109.49)         | 3.06 (2.28, 4.04)    | -76.66 | -3.66 (-3.94, -3.38) |
| Slovenia                         | 65.06 (57.54, 72.09)          | 6.08 (5.37, 6.74)    | 8.58 (5.45, 11.85)            | 0.94 (0.60, 1.30)    | -86.81 | -5.84 (-6.15, -5.52) |
| Solomon Islands                  | 76.09 (46.86, 105.87)         | 11.14 (6.86, 15.51)  | 58.84 (34.29, 87.91)          | 5.89 (3.43, 8.80)    | -22.67 | -2.22 (-2.44, -2.01) |
| Somalia                          | 2895.59 (1989.03, 4109.10)    | 19.76 (13.56, 28.01) | 4923.00 (3121.34, 7496.07)    | 11.88 (7.54, 18.08)  | 70.02  | -1.24 (-1.39, -1.10) |
| South Africa                     | 5915.38 (4661.16, 7277.67)    | 12.70 (10.01, 15.63) | 6378.64 (4826.03, 8332.67)    | 12.90 (9.76, 16.85)  | 7.83   | 0.90 (0.30, 1.50)    |
| South Korea                      | 1655.02 (1352.50, 2079.98)    | 5.08 (4.15, 6.40)    | 285.70 (235.64, 340.88)       | 1.44 (1.18, 1.71)    | -82.74 | -3.48 (-4.00, -2.95) |
| South Sudan                      | 2737.34 (1946.75, 3673.52)    | 22.96 (16.34, 30.74) | 2517.68 (1648.72, 3524.66)    | 14.61 (9.57, 20.44)  | -8.02  | -1.26 (-1.42, -1.10) |
| Spain                            | 884.56 (795.35, 1009.40)      | 4.62 (4.15, 5.27)    | 159.31 (125.05, 198.00)       | 0.89 (0.70, 1.11)    | -81.99 | -5.23 (-5.63, -4.82) |
| Sri Lanka                        | 1742.66 (1377.26, 2160.37)    | 10.16 (8.03, 12.59)  | 525.92 (348.50, 763.78)       | 3.68 (2.43, 5.34)    | -69.82 | -2.75 (-3.25, -2.26) |
| Sudan                            | 26705.76 (20245.42, 35265.30) | 57.98 (43.97, 76.97) | 14192.45 (10360.05, 19089.00) | 25.24 (18.43, 33.95) | -46.86 | -2.41 (-2.57, -2.26) |
| Suriname                         | 130.48 (107.49, 153.52)       | 29.98 (24.69, 35.27) | 65.03 (43.82, 92.99)          | 15.10 (10.17, 21.59) | -50.16 | -2.51 (-2.64, -2.37) |
| Sweden                           | 136.32 (121.15, 151.04)       | 2.27 (2.02, 2.52)    | 41.33 (29.79, 51.93)          | 0.72 (0.52, 0.91)    | -69.68 | -3.49 (-4.10, -2.89) |
| Switzerland                      | 125.94 (109.50, 145.70)       | 3.14 (2.73, 3.64)    | 62.77 (52.40, 75.01)          | 1.47 (1.23, 1.76)    | -50.16 | -2.18 (-2.42, -1.95) |
| Syrian Arab Republic             | 5624.96 (3905.63, 7593.71)    | 23.31 (16.19, 31.47) | 451.83 (290.51, 641.71)       | 4.03 (2.59, 5.73)    | -91.97 | -5.41 (-6.85, -3.95) |

|                              |                               |                      |                              |                      |        |                      |
|------------------------------|-------------------------------|----------------------|------------------------------|----------------------|--------|----------------------|
| Taiwan (Province of China)   | 303.27 (257.83, 344.94)       | 1.90 (1.61, 2.16)    | 141.15 (106.72, 184.65)      | 1.65 (1.25, 2.16)    | -53.46 | -2.25 (-3.63, -0.85) |
| Tajikistan                   | 808.56 (560.47, 1102.78)      | 8.25 (5.72, 11.25)   | 739.03 (507.83, 1032.98)     | 6.06 (4.16, 8.47)    | -8.6   | -1.19 (-1.48, -0.89) |
| Thailand                     | 8087.51 (5598.67, 11054.48)   | 14.00 (9.71, 19.10)  | 10129.58 (6431.99, 15038.42) | 10.27 (6.53, 15.25)  | 25.25  | -0.68 (-0.96, -0.40) |
| Timor-Leste                  | 7424.61 (5735.13, 9252.80)    | 14.57 (11.26, 18.16) | 715.52 (522.54, 951.73)      | 2.53 (1.85, 3.37)    | -90.36 | -6.25 (-6.58, -5.92) |
| Togo                         | 461.48 (362.28, 581.11)       | 27.18 (21.32, 34.18) | 251.97 (178.97, 330.46)      | 13.71 (9.74, 17.98)  | -45.4  | -2.34 (-2.45, -2.23) |
| Tokelau                      | 1774.37 (1256.10, 2315.58)    | 22.73 (16.11, 29.66) | 1619.64 (1058.15, 2300.79)   | 14.34 (9.37, 20.36)  | -8.72  | -1.49 (-1.53, -1.46) |
| Tonga                        | 0.27 (0.20, 0.36)             | 9.49 (6.99, 12.65)   | 0.04 (0.02, 0.05)            | 2.07 (1.30, 2.96)    | -86.44 | -5.30 (-5.58, -5.03) |
| Trinidad and Tobago          | 13.06 (9.80, 16.77)           | 10.44 (7.84, 13.41)  | 5.60 (3.67, 8.02)            | 4.98 (3.26, 7.13)    | -57.11 | -2.47 (-2.62, -2.31) |
| Tunisia                      | 166.43 (134.54, 202.00)       | 14.76 (11.93, 17.92) | 53.11 (35.59, 75.98)         | 7.16 (4.80, 10.25)   | -68.09 | -3.10 (-3.56, -2.64) |
| Turkey                       | 3648.46 (2825.70, 4657.87)    | 32.12 (24.88, 41.01) | 507.03 (381.00, 657.89)      | 6.29 (4.73, 8.16)    | -86.1  | -5.39 (-5.55, -5.23) |
| Turkmenistan                 | 30592.92 (23900.59, 37965.10) | 38.86 (30.37, 48.22) | 3821.89 (2809.88, 4939.85)   | 8.10 (5.96, 10.47)   | -87.51 | -5.20 (-5.34, -5.07) |
| Tuvalu                       | 671.36 (474.59, 916.32)       | 10.71 (7.58, 14.61)  | 513.14 (385.55, 679.04)      | 9.55 (7.17, 12.63)   | -23.57 | 0.27 (-0.33, 0.87)   |
| Uganda                       | 3.50 (2.65, 4.47)             | 25.39 (19.24, 32.40) | 0.54 (0.36, 0.78)            | 5.20 (3.47, 7.48)    | -84.49 | -5.39 (-5.48, -5.31) |
| Ukraine                      | 6413.04 (4219.54, 9186.98)    | 14.59 (9.62, 20.84)  | 8359.92 (4716.19, 12675.06)  | 11.09 (6.26, 16.81)  | 30.36  | -0.58 (-0.75, -0.40) |
| United Arab Emirates         | 2071.76 (1495.26, 2771.65)    | 6.53 (4.71, 8.74)    | 363.81 (270.86, 473.32)      | 1.94 (1.44, 2.52)    | -82.44 | -4.59 (-5.00, -4.17) |
| United Kingdom               | 203.59 (142.31, 285.56)       | 9.14 (6.39, 12.82)   | 35.48 (21.34, 52.96)         | 1.30 (0.78, 1.95)    | -82.57 | -5.65 (-6.13, -5.18) |
| Tanzania                     | 1955.03 (1769.76, 2082.11)    | 5.09 (4.61, 5.42)    | 1103.22 (906.40, 1324.38)    | 2.90 (2.39, 3.49)    | -43.57 | -1.79 (-2.01, -1.58) |
| United States of America     | 12229.92 (11607.64, 12940.54) | 6.09 (5.78, 6.45)    | 6400.41 (5824.37, 7049.35)   | 3.48 (3.17, 3.83)    | -47.67 | -1.65 (-1.77, -1.52) |
| United States Virgin Islands | 12.82 (10.53, 15.27)          | 11.83 (9.72, 14.10)  | 2.19 (1.48, 3.10)            | 3.61 (2.44, 5.12)    | -82.92 | -3.91 (-4.08, -3.75) |
| Uruguay                      | 315.43 (272.06, 350.39)       | 11.90 (10.26, 13.22) | 67.73 (47.32, 94.52)         | 3.08 (2.15, 4.29)    | -78.53 | -4.98 (-5.28, -4.67) |
| Uzbekistan                   | 1917.93 (1309.02, 2545.44)    | 5.61 (3.83, 7.44)    | 1829.90 (1414.09, 2391.43)   | 5.33 (4.12, 6.97)    | -4.59  | 0.07 (-0.15, 0.30)   |
| Vanuatu                      | 36.54 (26.41, 48.43)          | 13.38 (9.67, 17.73)  | 35.10 (25.36, 46.36)         | 9.49 (6.86, 12.53)   | -3.94  | -0.89 (-1.13, -0.65) |
| Venezuela                    | 4014.66 (3434.50, 4525.07)    | 14.66 (12.54, 16.52) | 1646.29 (1139.83, 2369.93)   | 7.23 (5.01, 10.42)   | -58.99 | -2.06 (-2.42, -1.70) |
| Viet Nam                     | 17772.10 (14138.50, 21571.25) | 20.29 (16.14, 24.63) | 3556.87 (2300.21, 4987.55)   | 5.55 (3.59, 7.77)    | -79.99 | -4.31 (-4.46, -4.16) |
| Yemen                        | 13208.67 (7218.16, 20502.32)  | 41.42 (22.62, 64.24) | 10248.79 (6626.53, 14623.75) | 22.94 (14.83, 32.74) | -22.41 | -1.91 (-1.97, -1.86) |
| Zambia                       | 1945.42 (1349.17, 2599.52)    | 10.70 (7.44, 14.31)  | 2195.63 (1345.03, 3271.42)   | 7.48 (4.58, 11.15)   | 12.86  | -1.04 (-1.32, -0.77) |
| Zimbabwe                     | 2826.36 (2105.31, 3519.14)    | 15.44 (11.50, 19.23) | 3604.76 (2546.26, 4969.19)   | 16.97 (11.99, 23.39) | 27.54  | 0.58 (0.40, 0.76)    |

ASMR: age-standardized mortality rate; CI: confidence interval; EAPC: estimated annual percentage change; UI: uncertainty interval.
